# Supplementary material for: Jean-Michel forever
Source: Royal Society of Chemistry journal article supplement (doi:10.1039/b903679m), 2009-01-01
Supplement: b903679m.pdf [file b903679m.pdf]

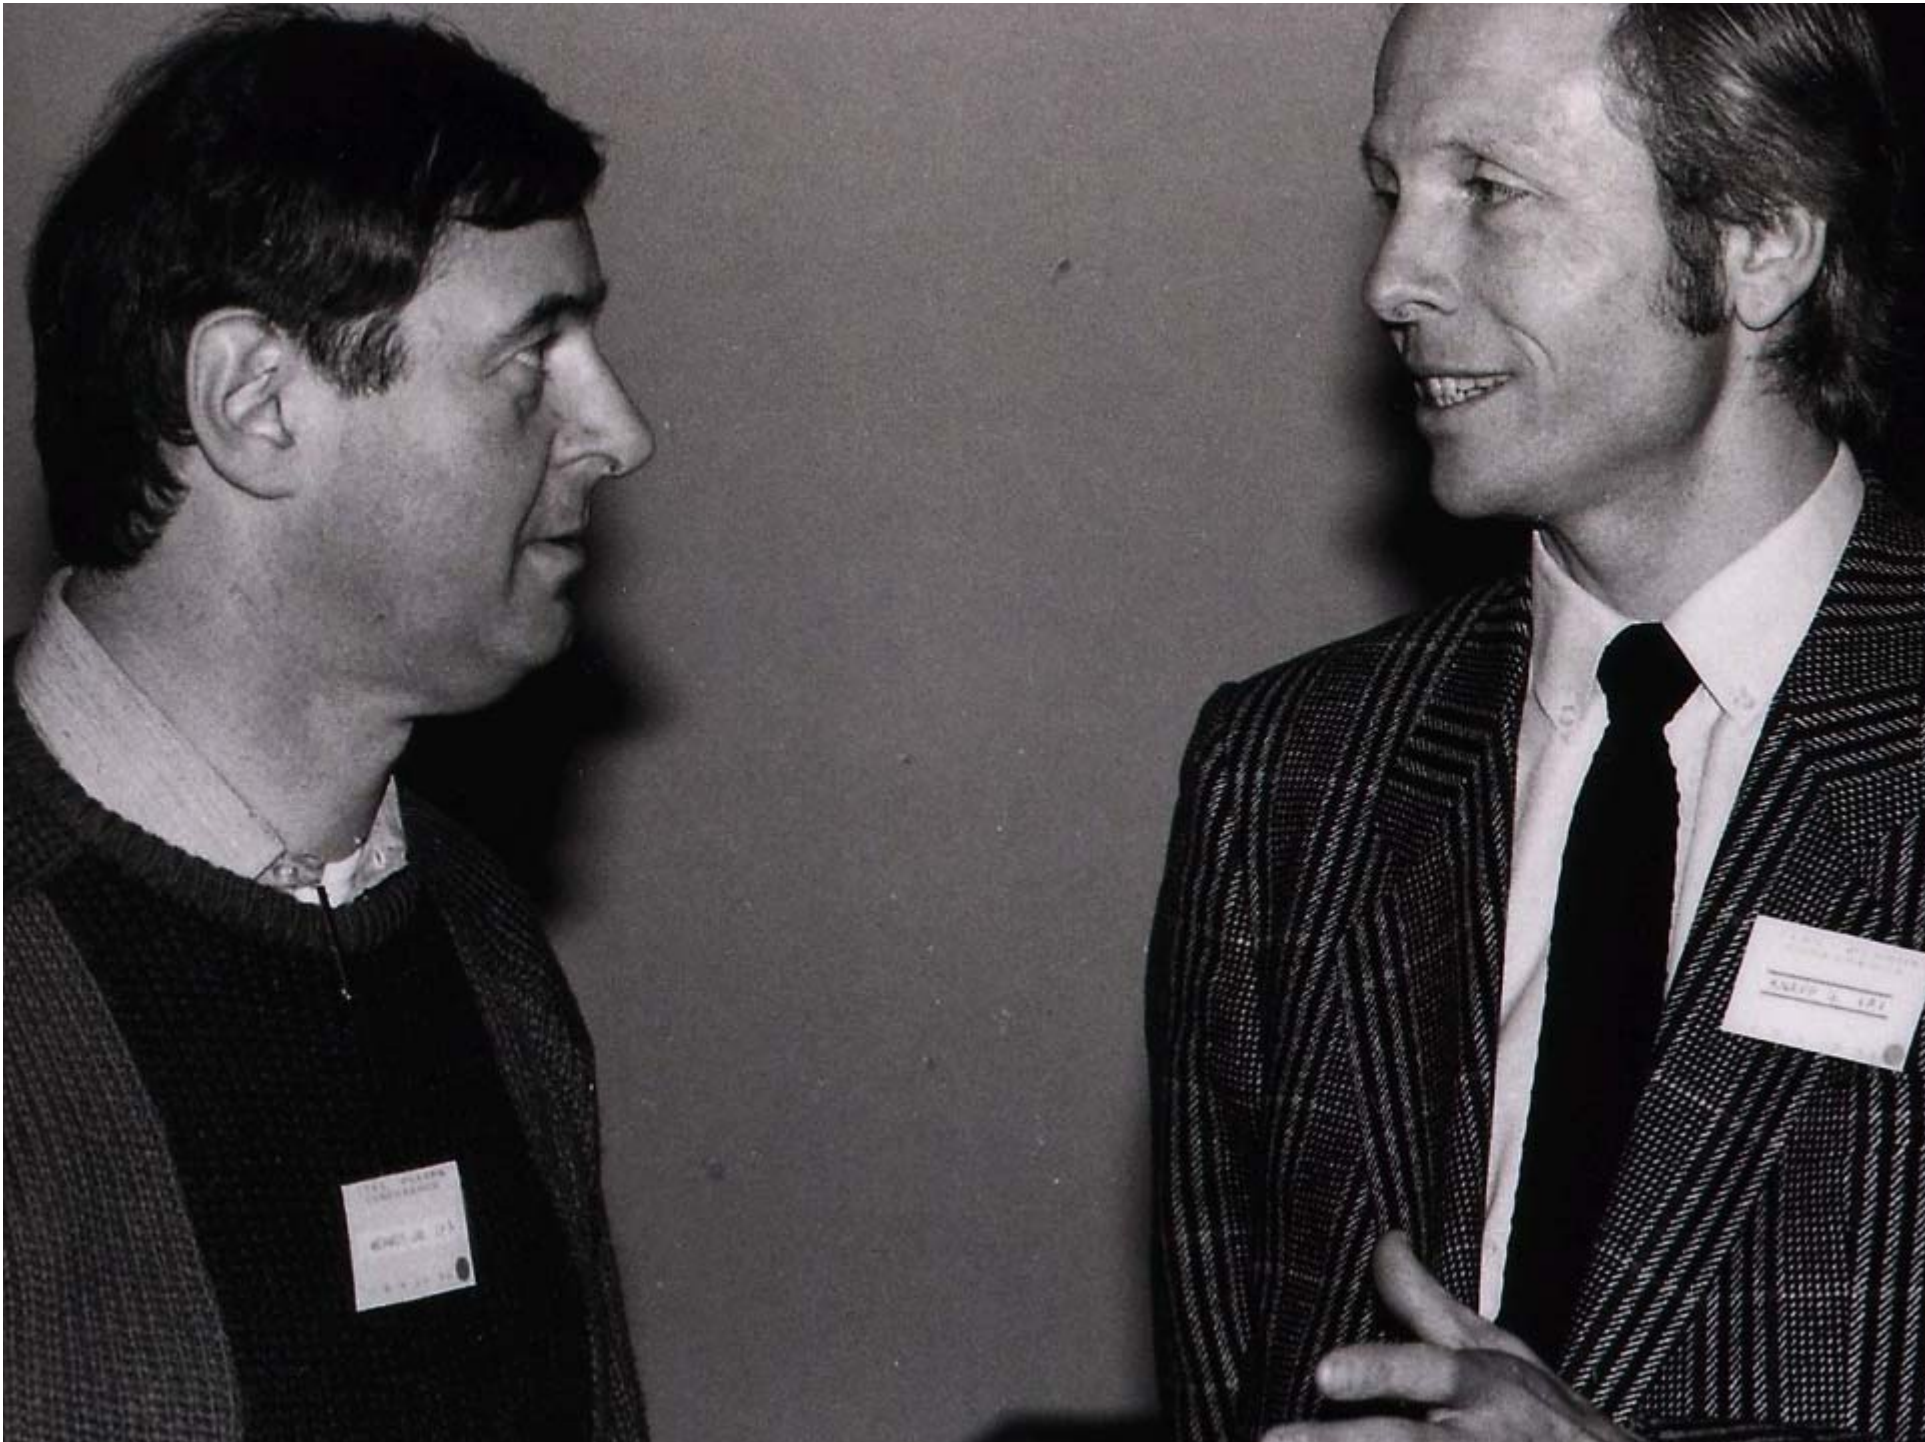

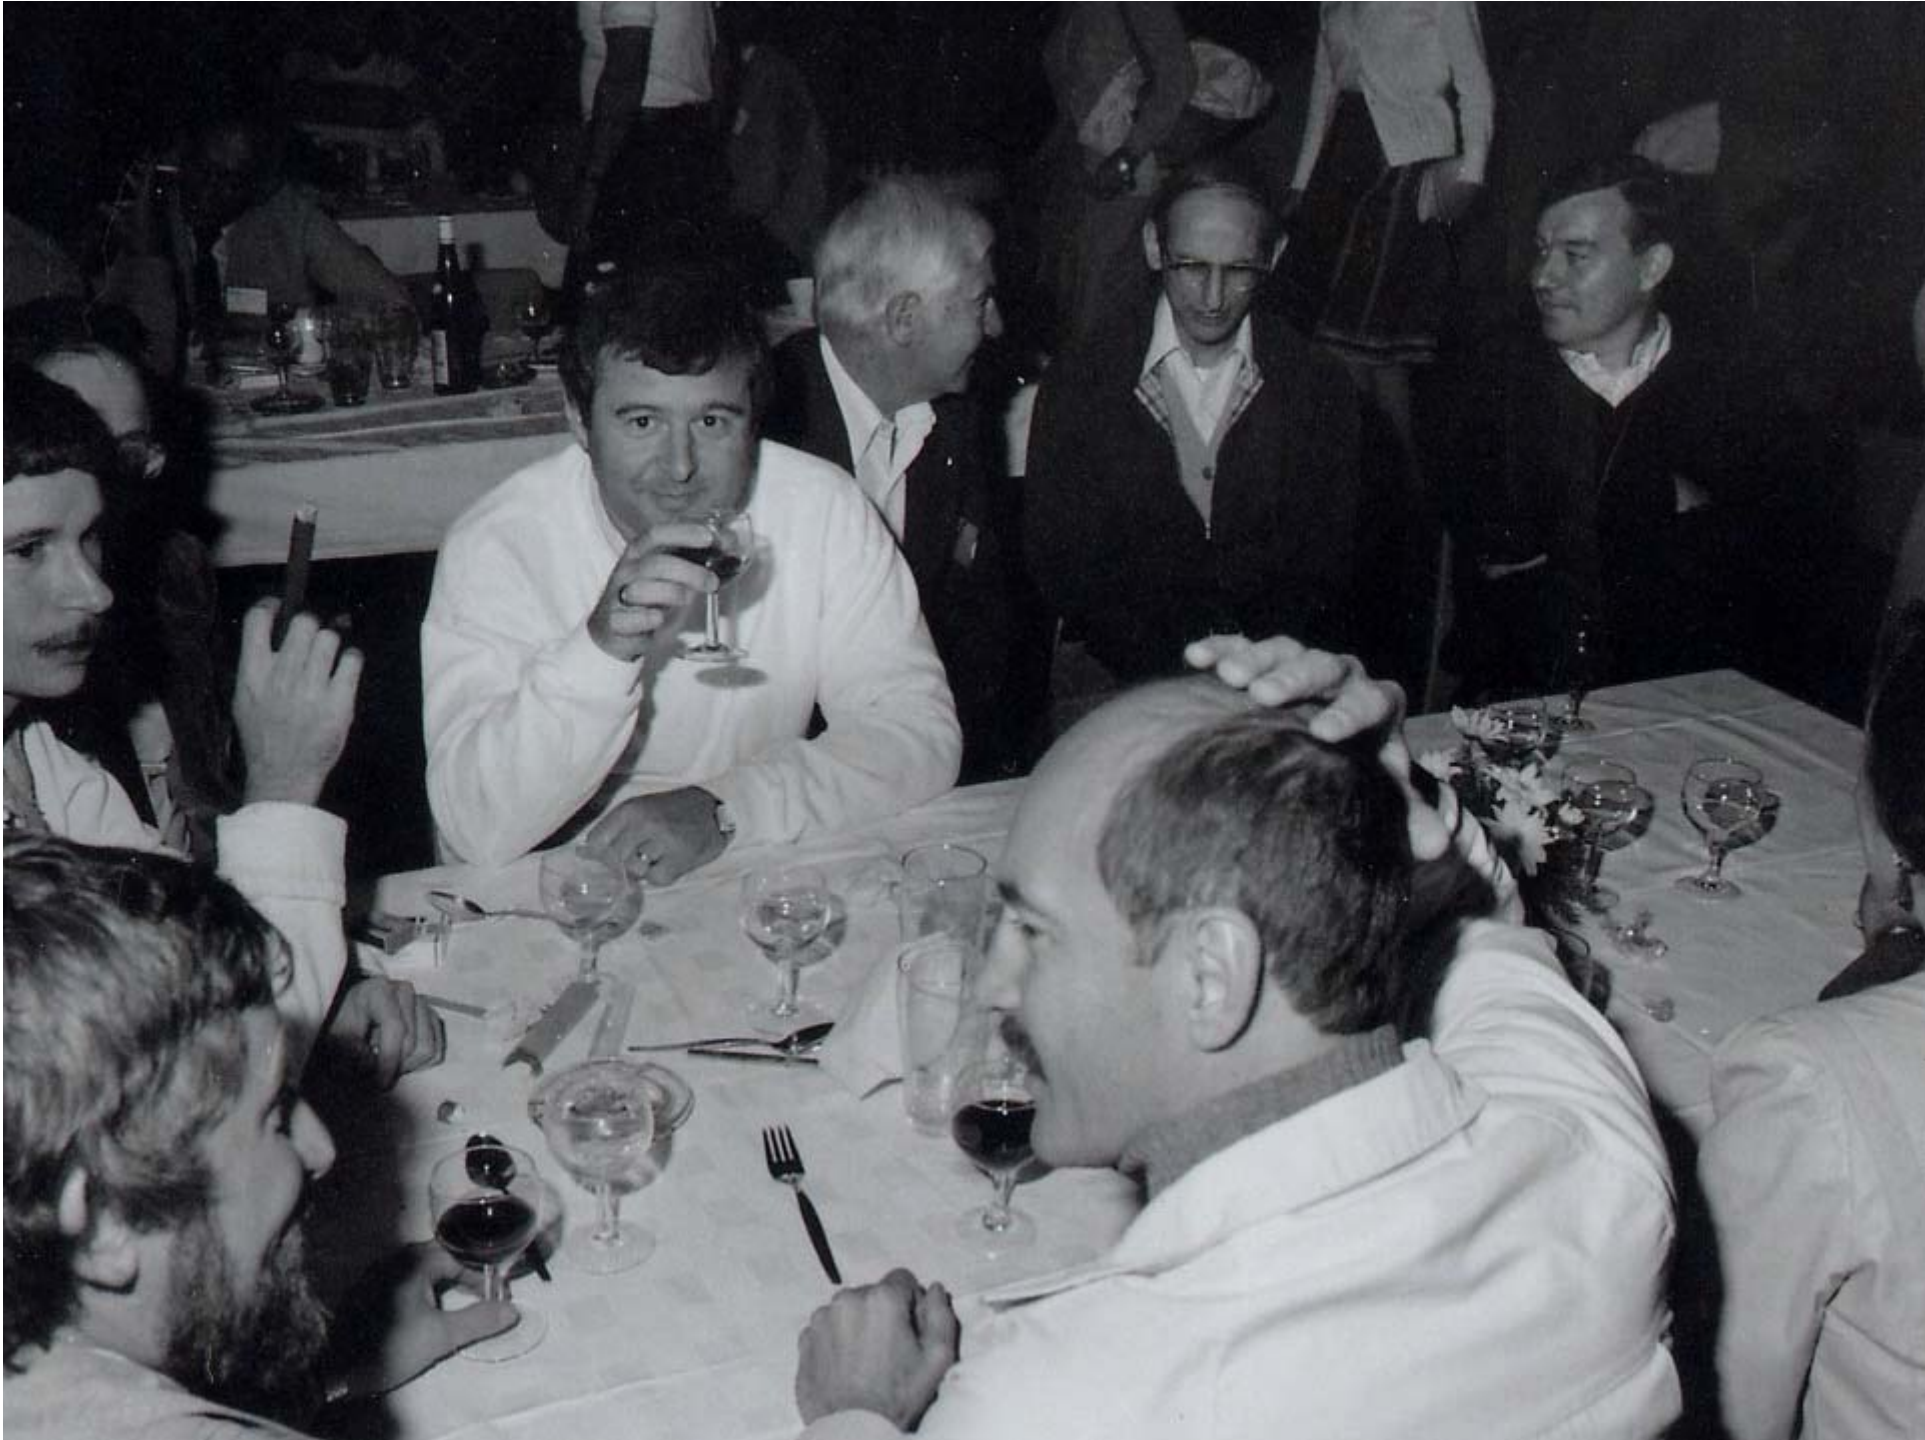

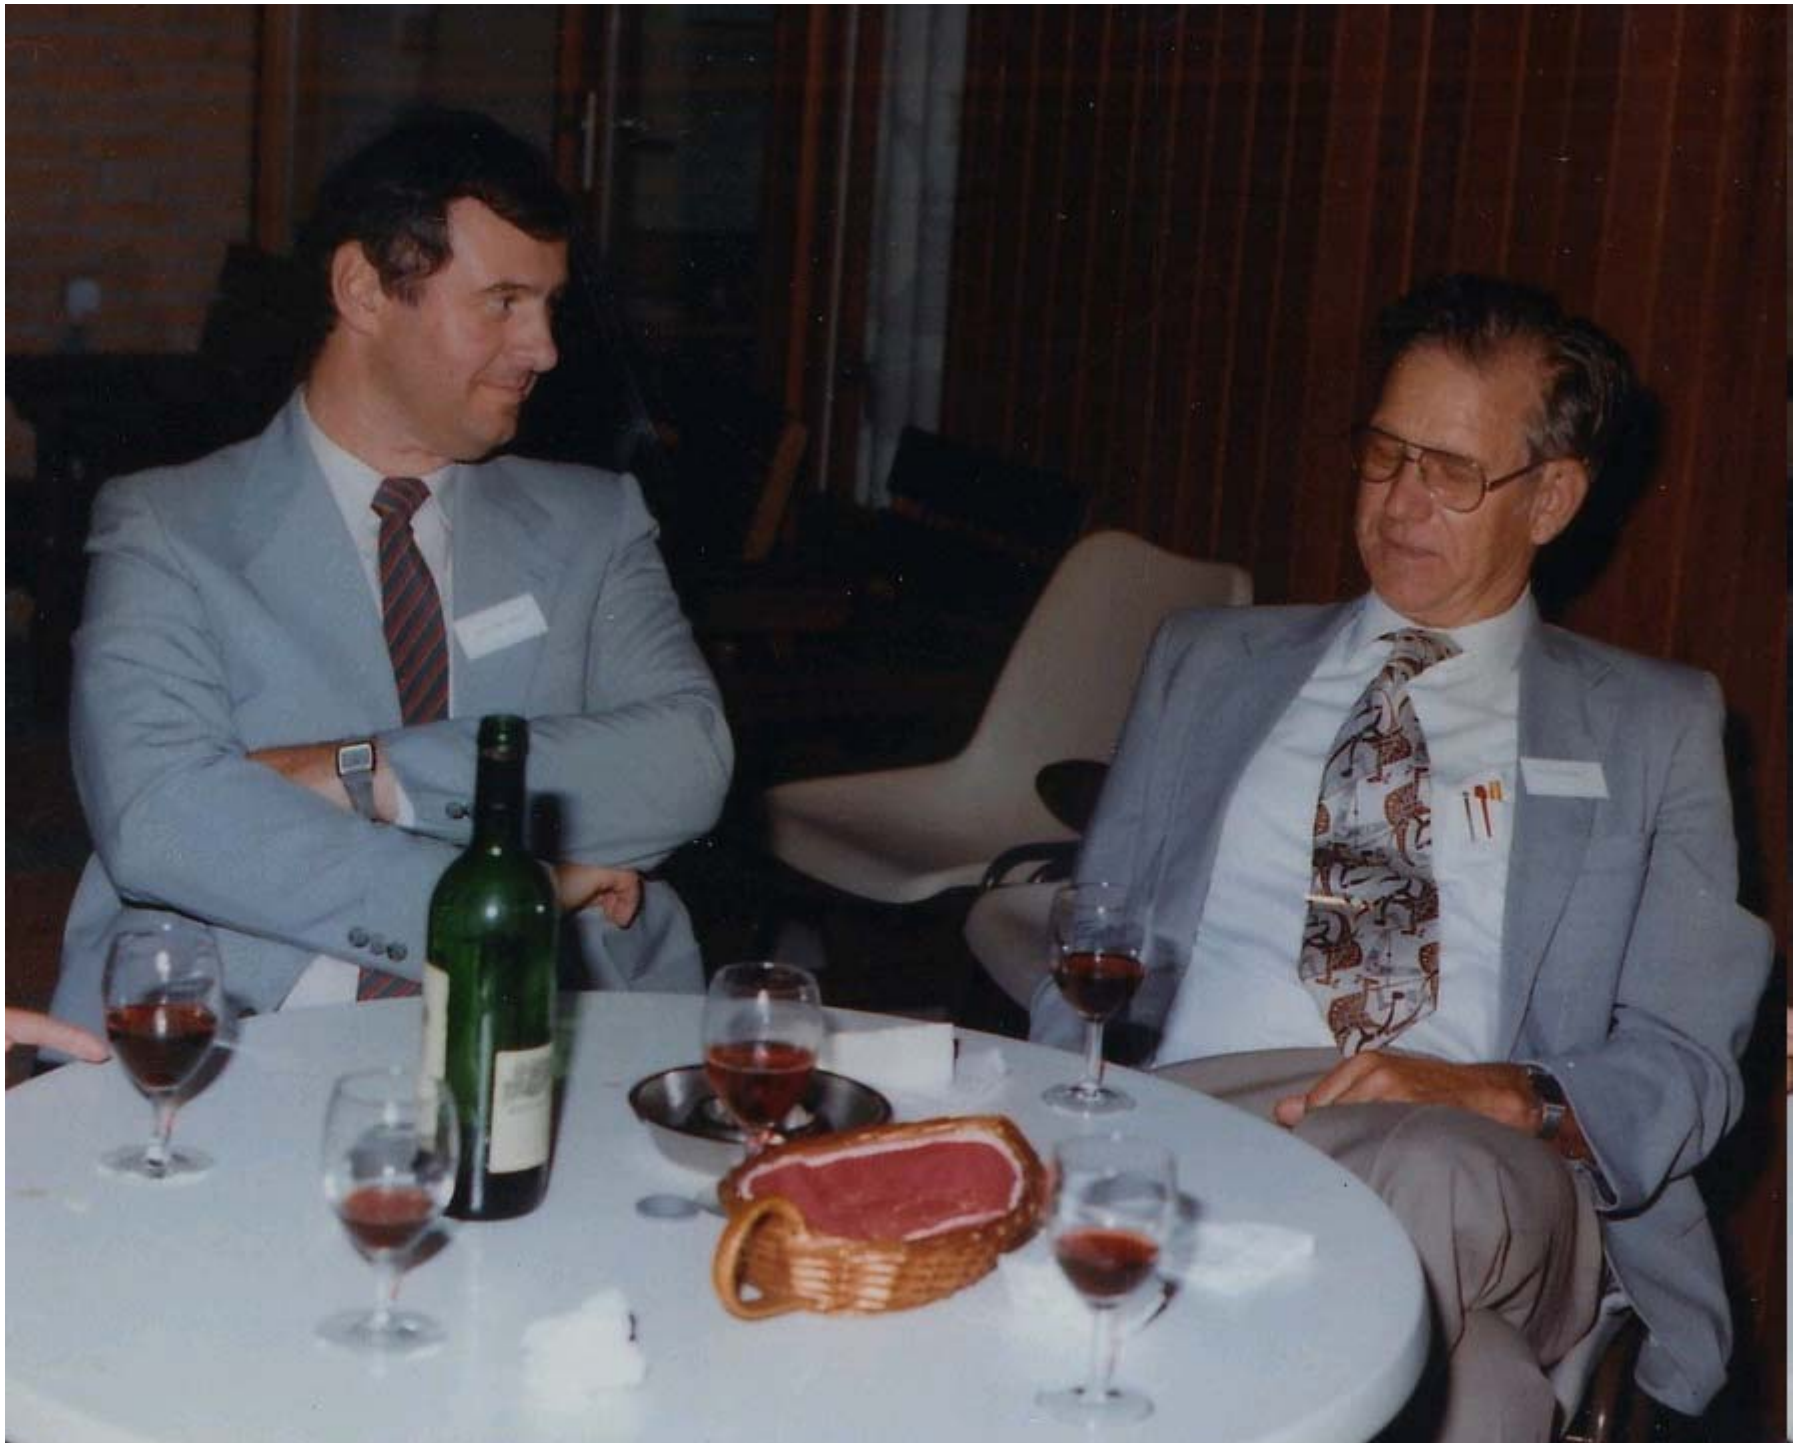

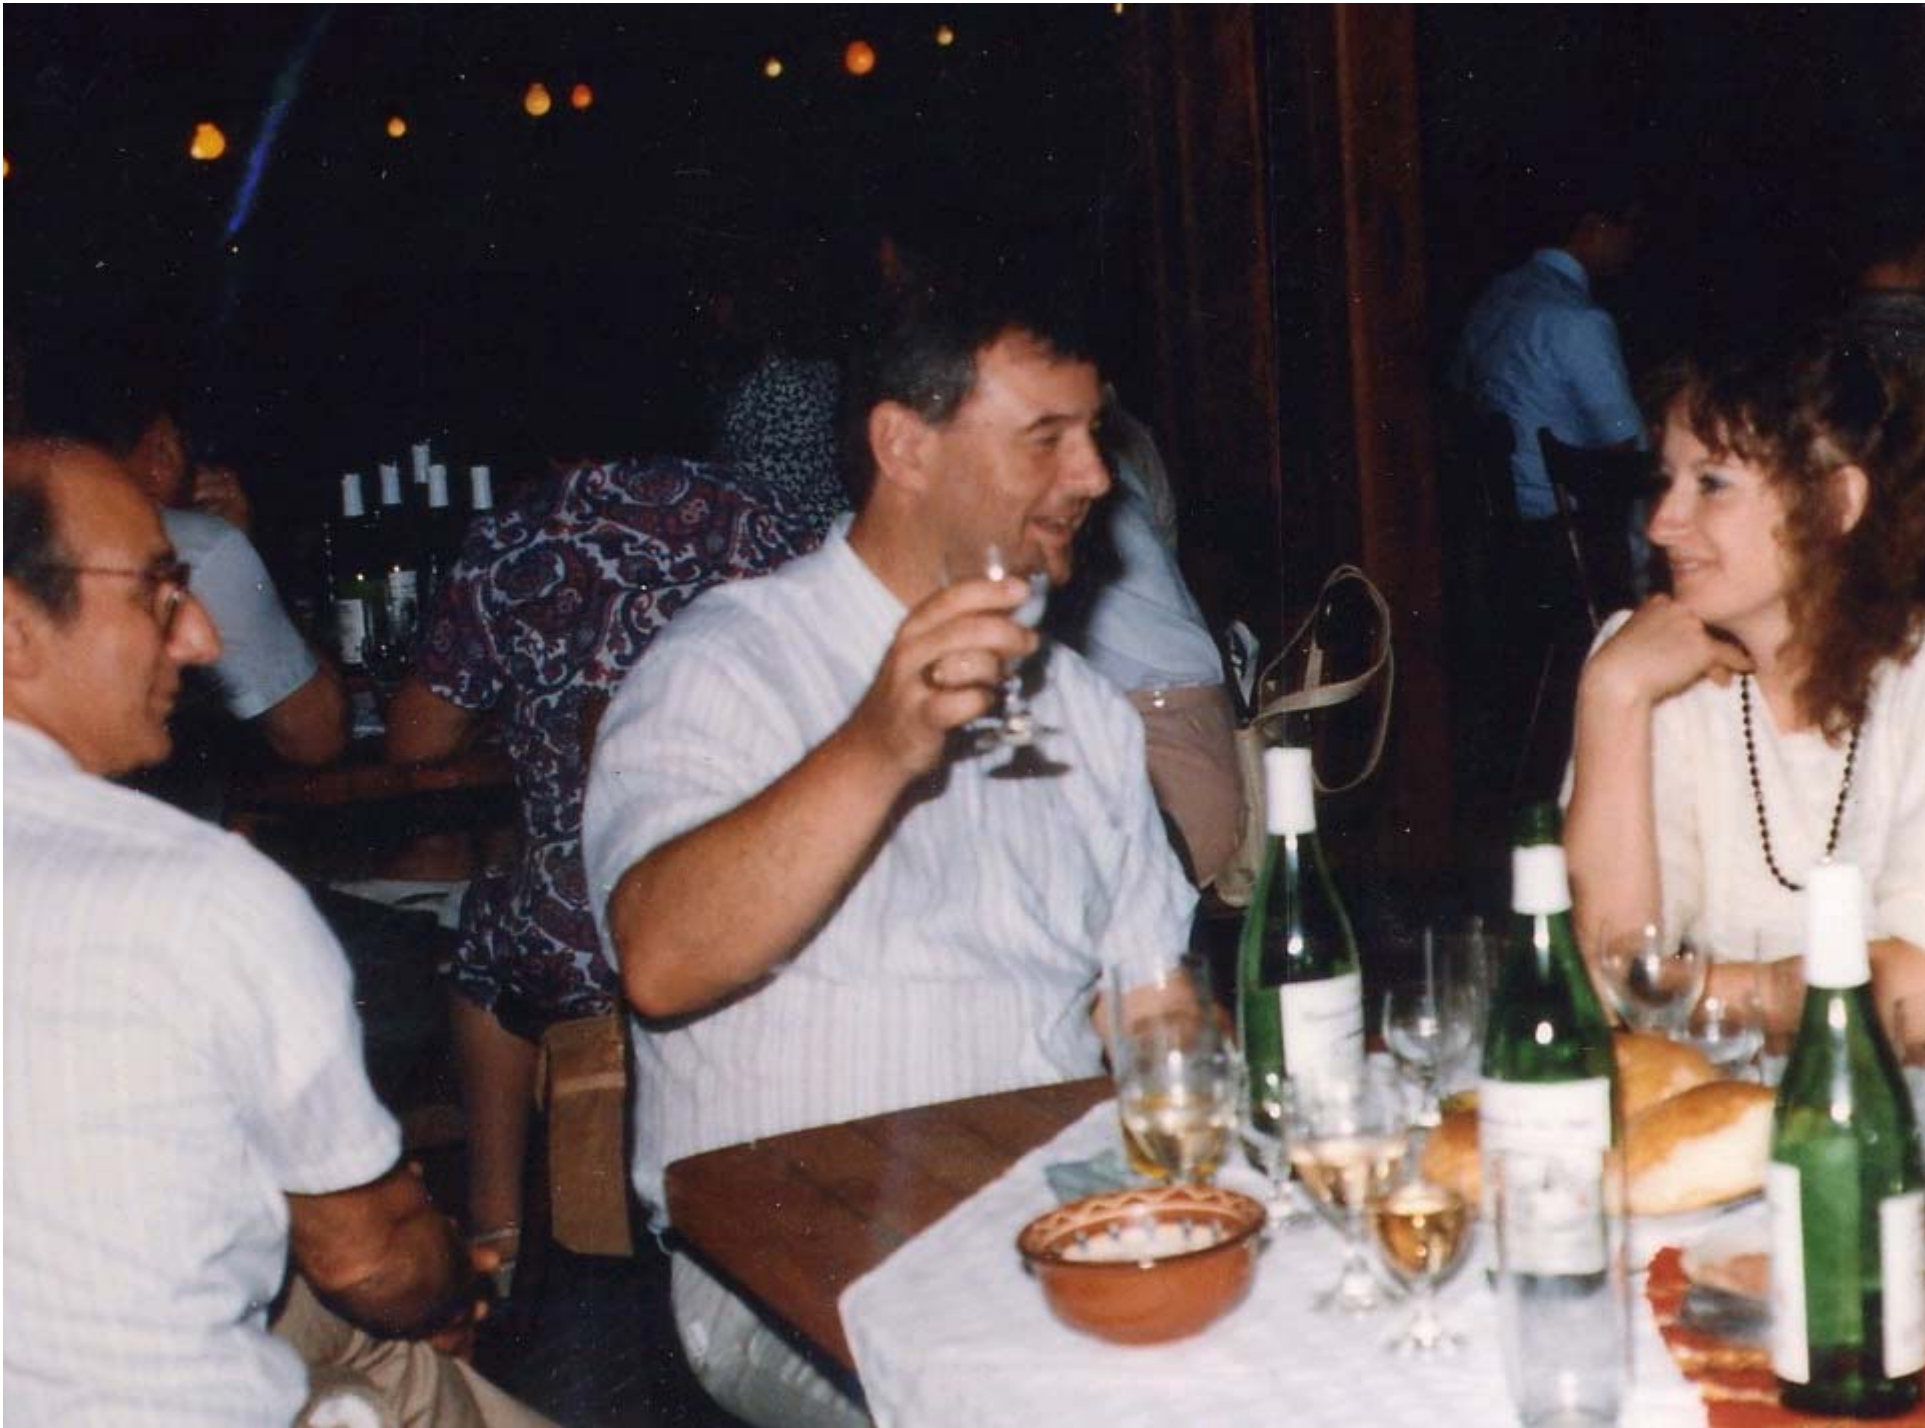

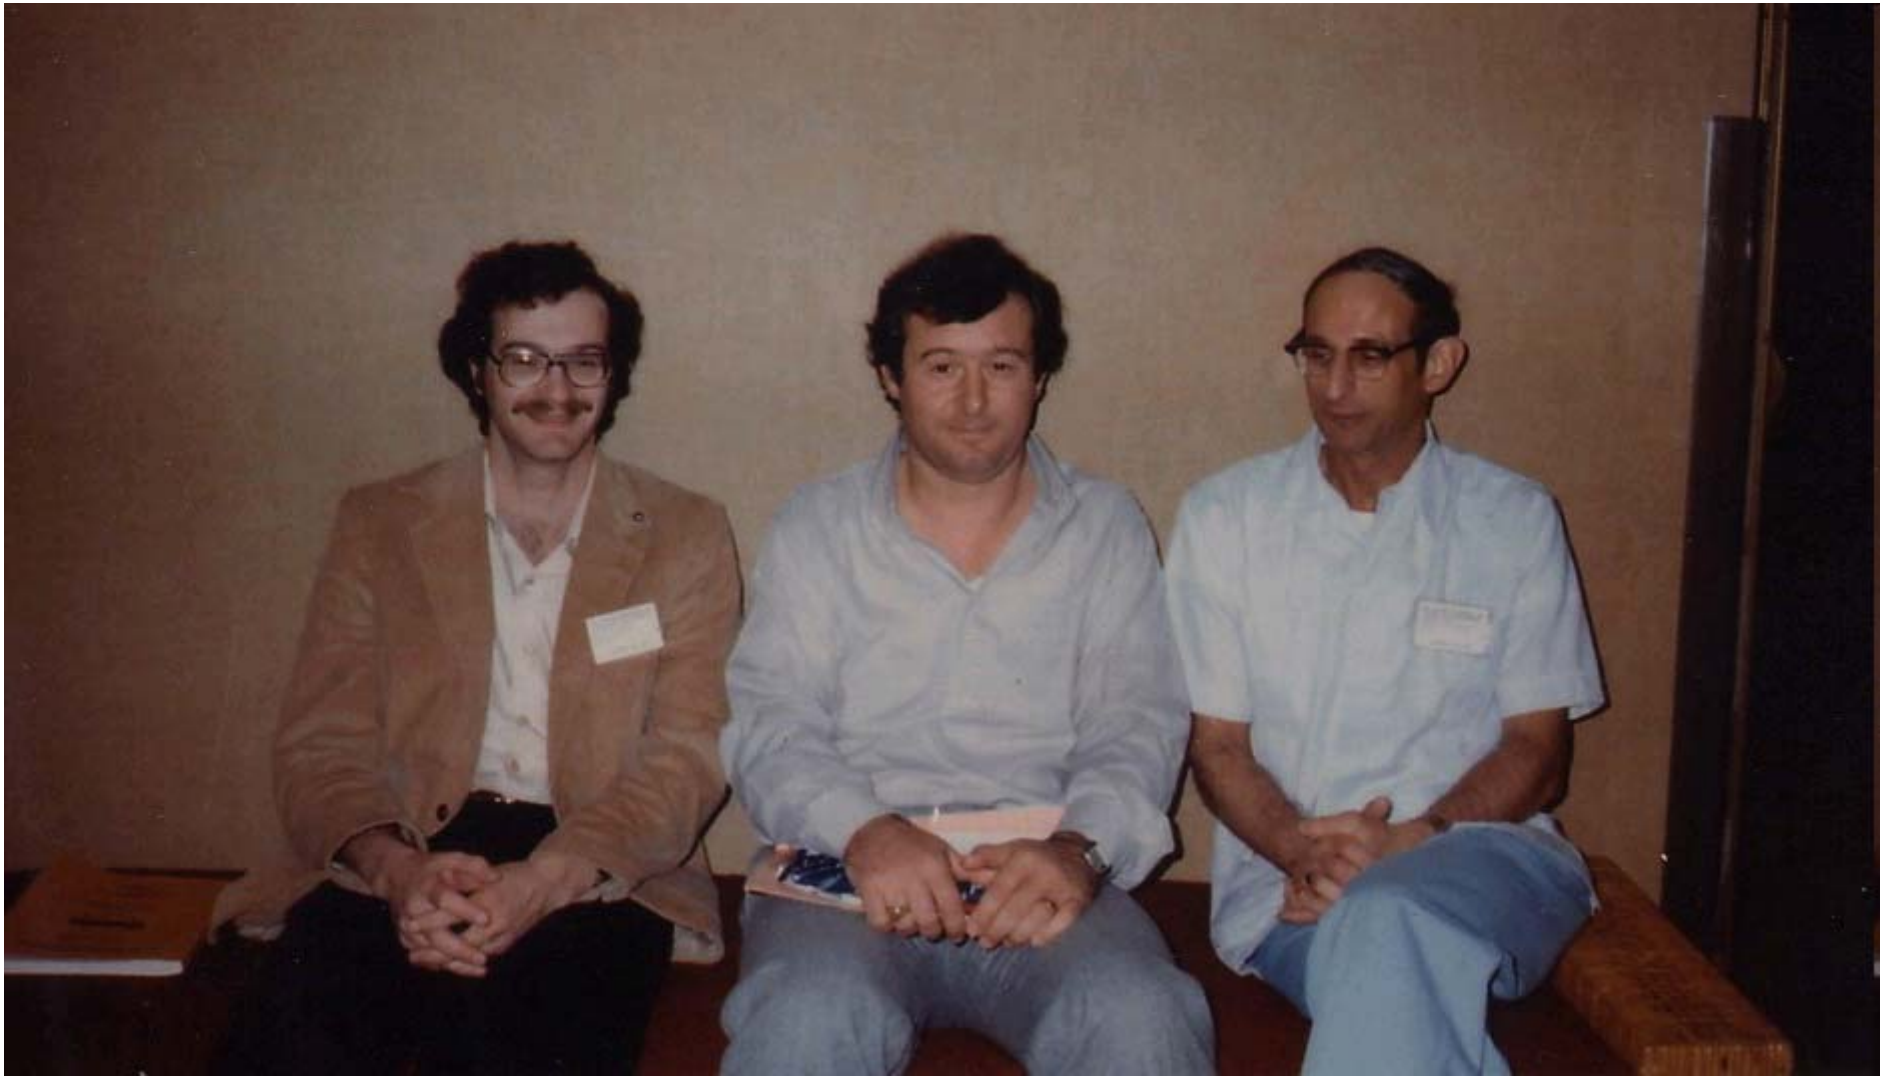

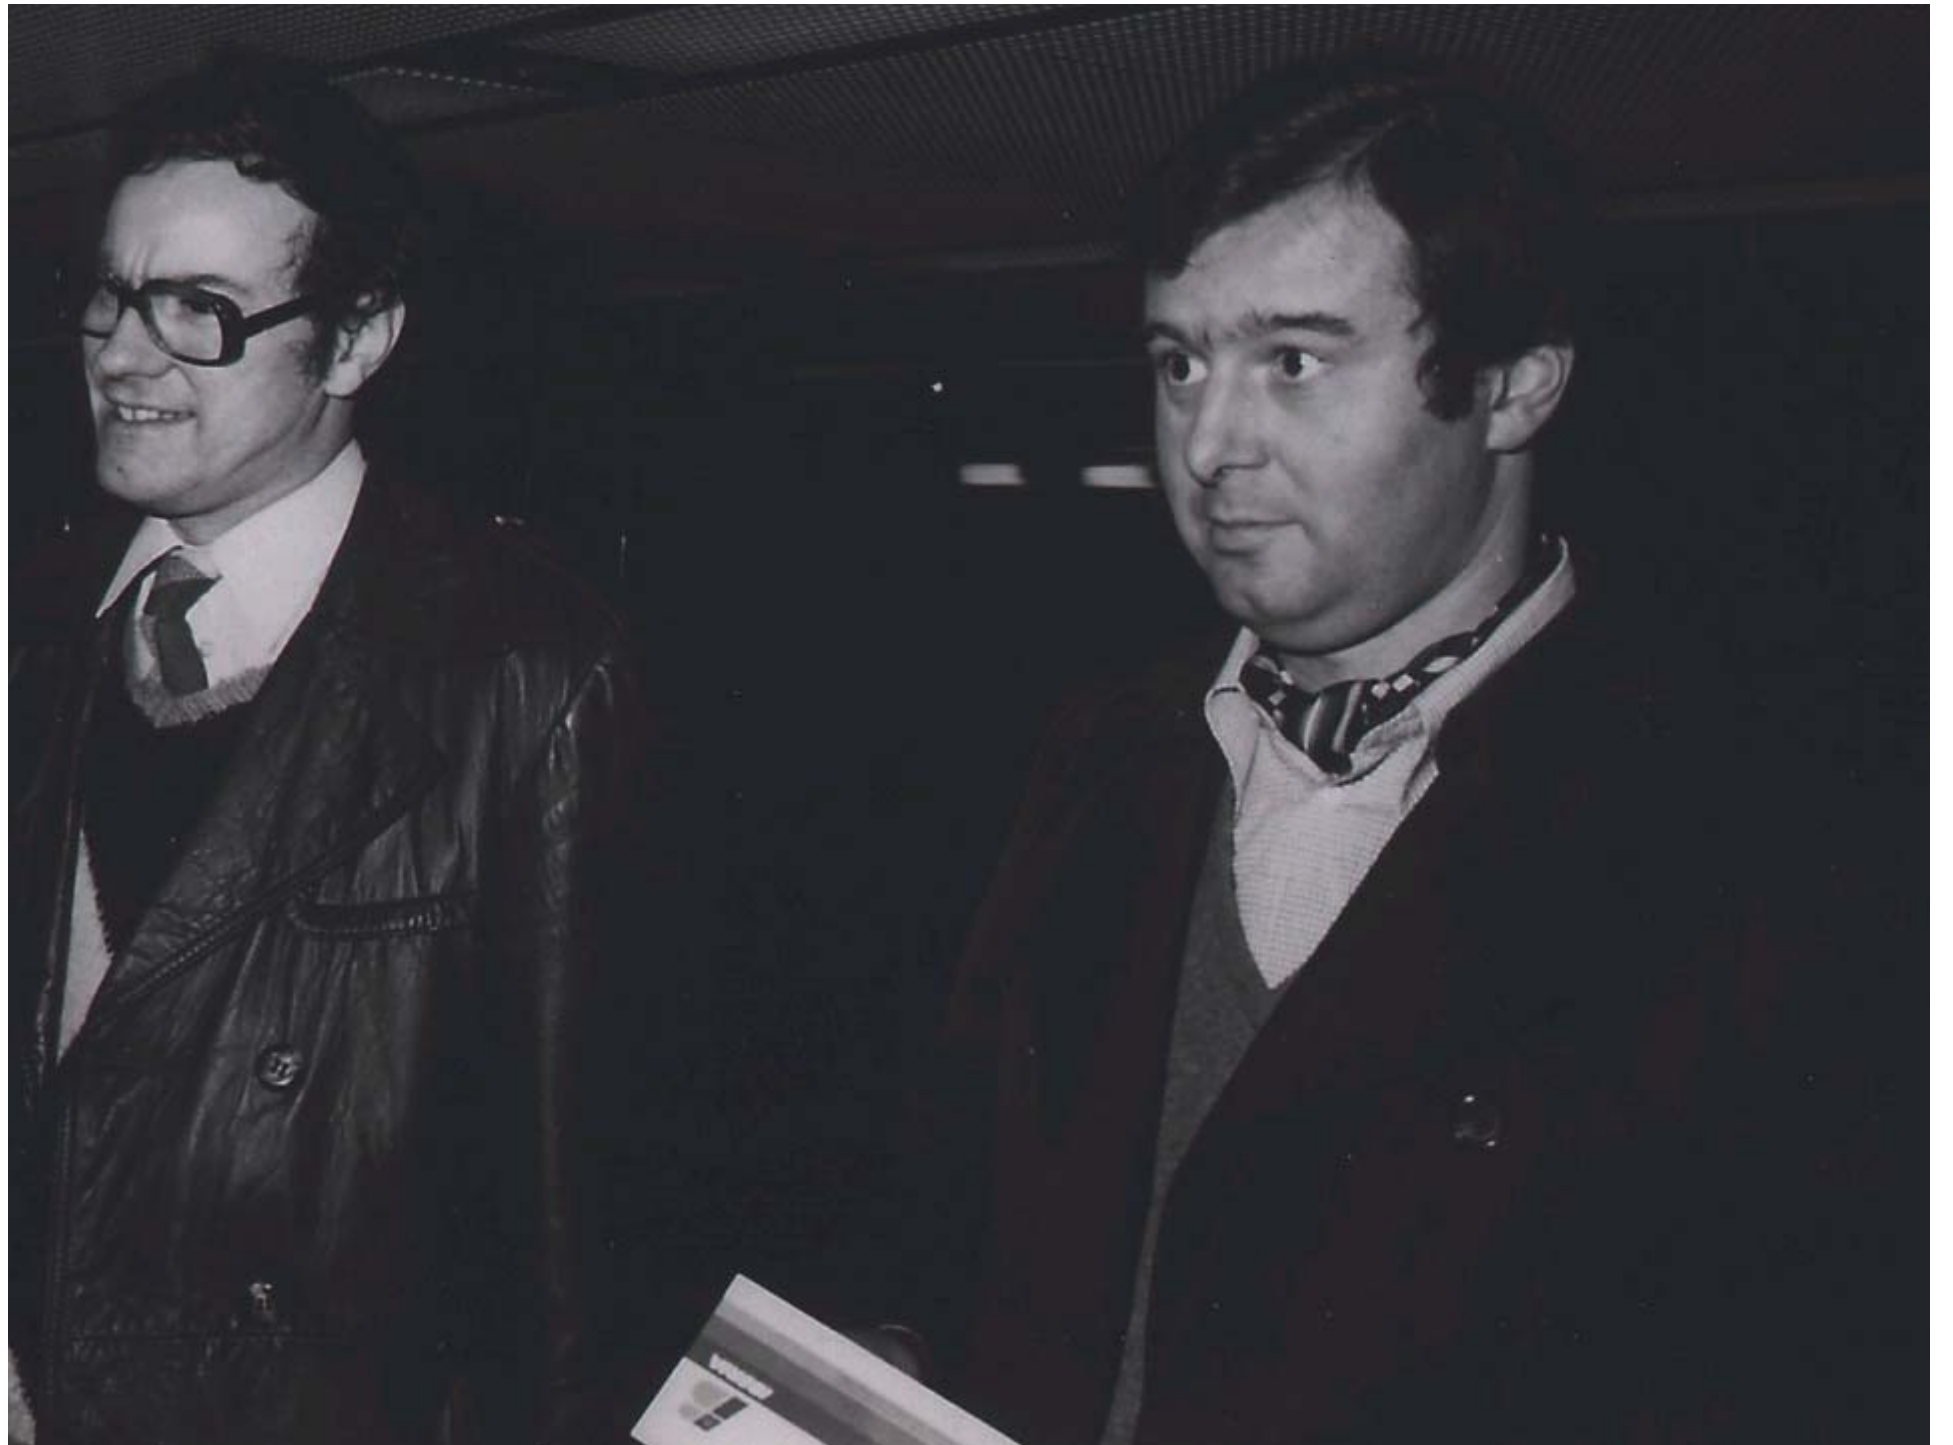

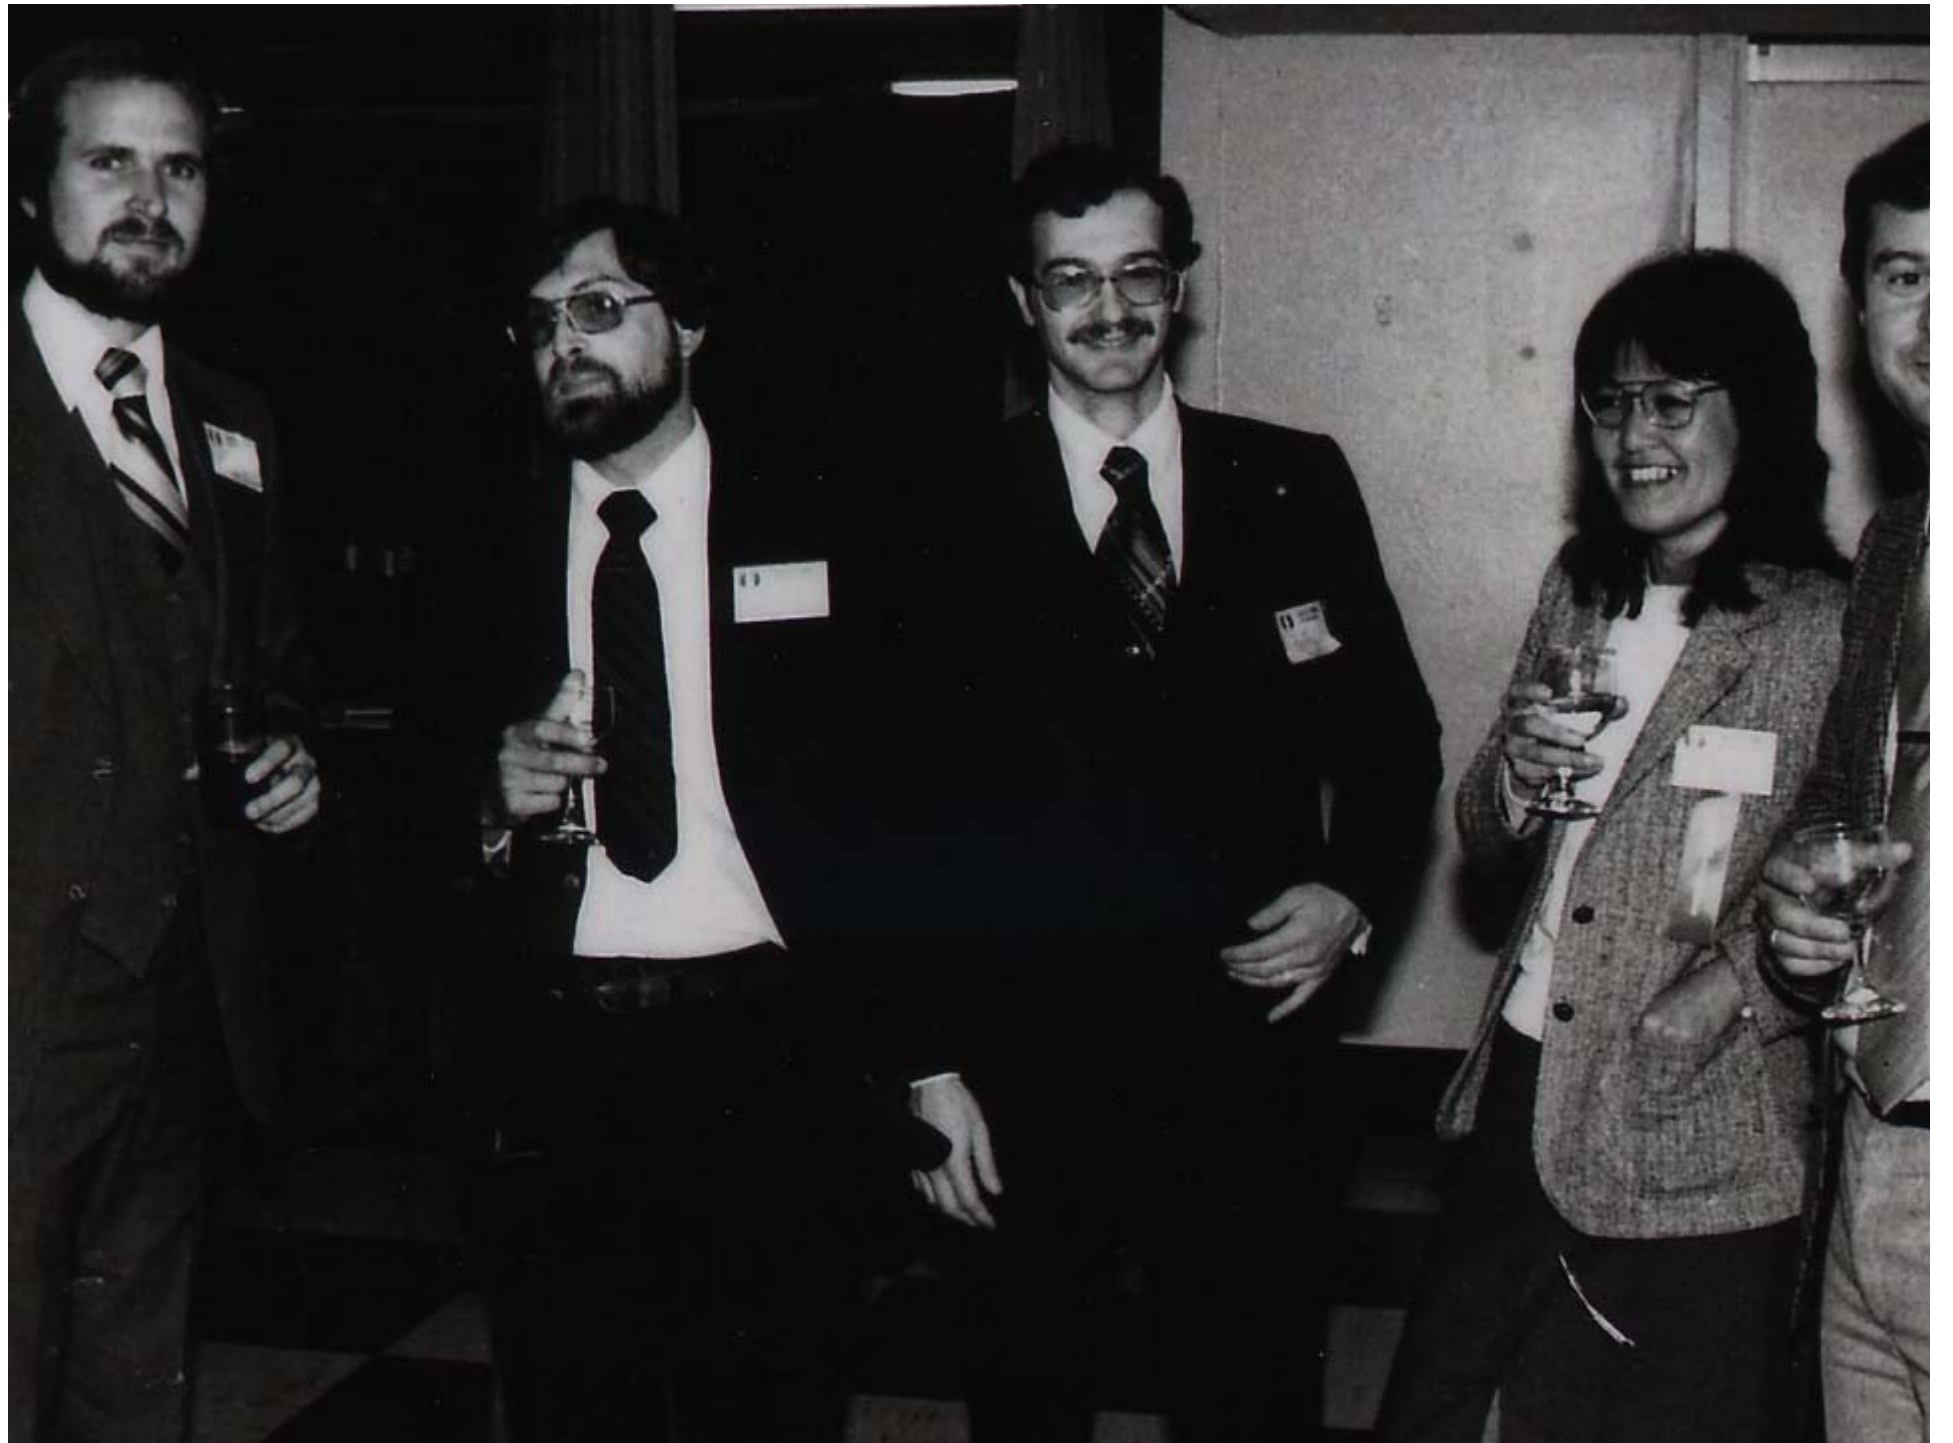

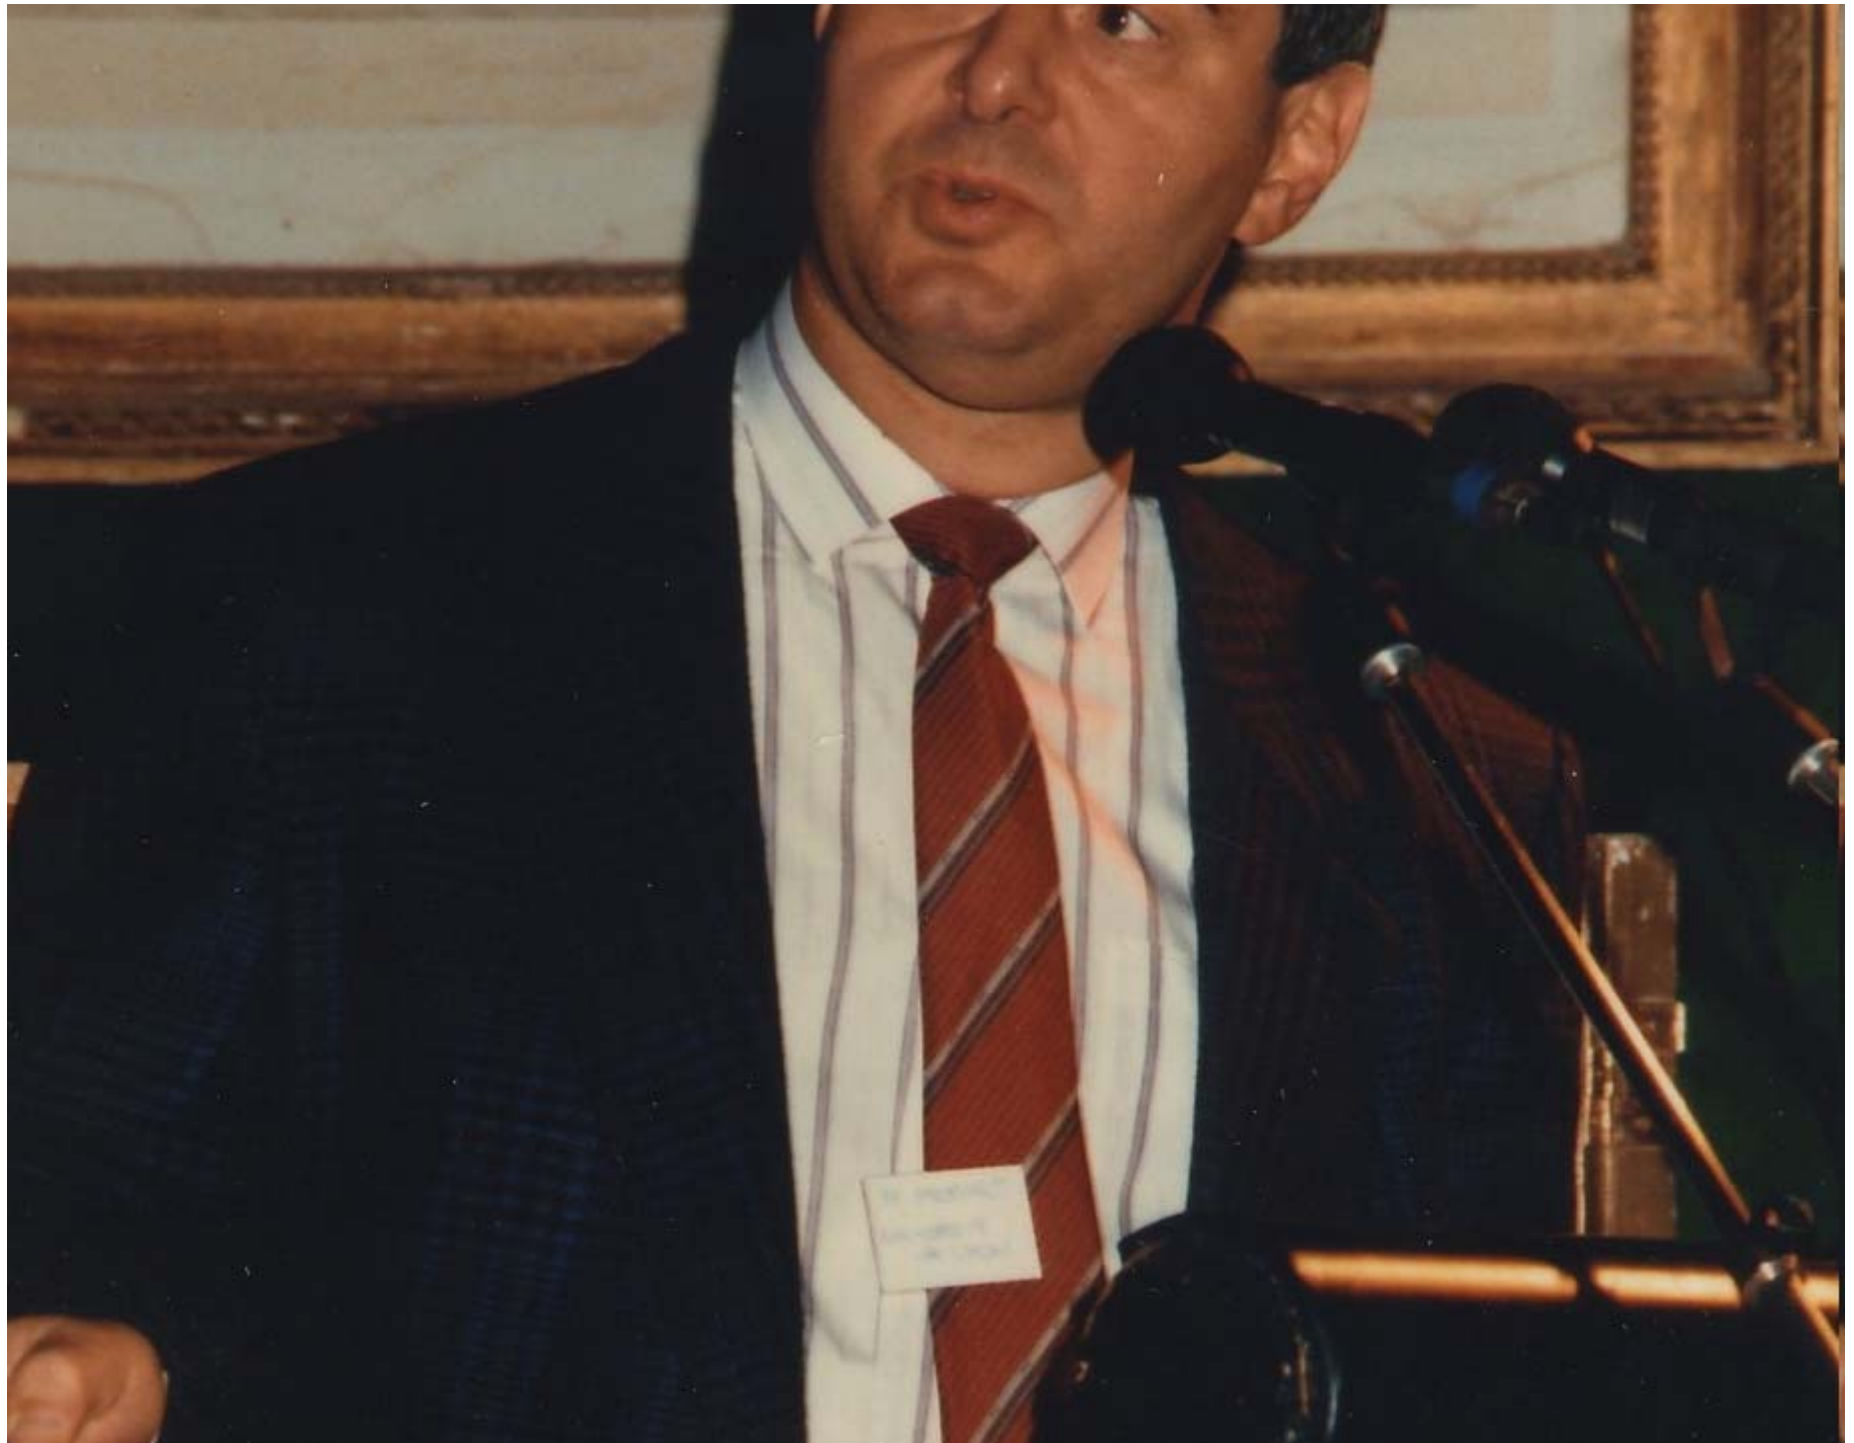



April 10 - 13, 1978

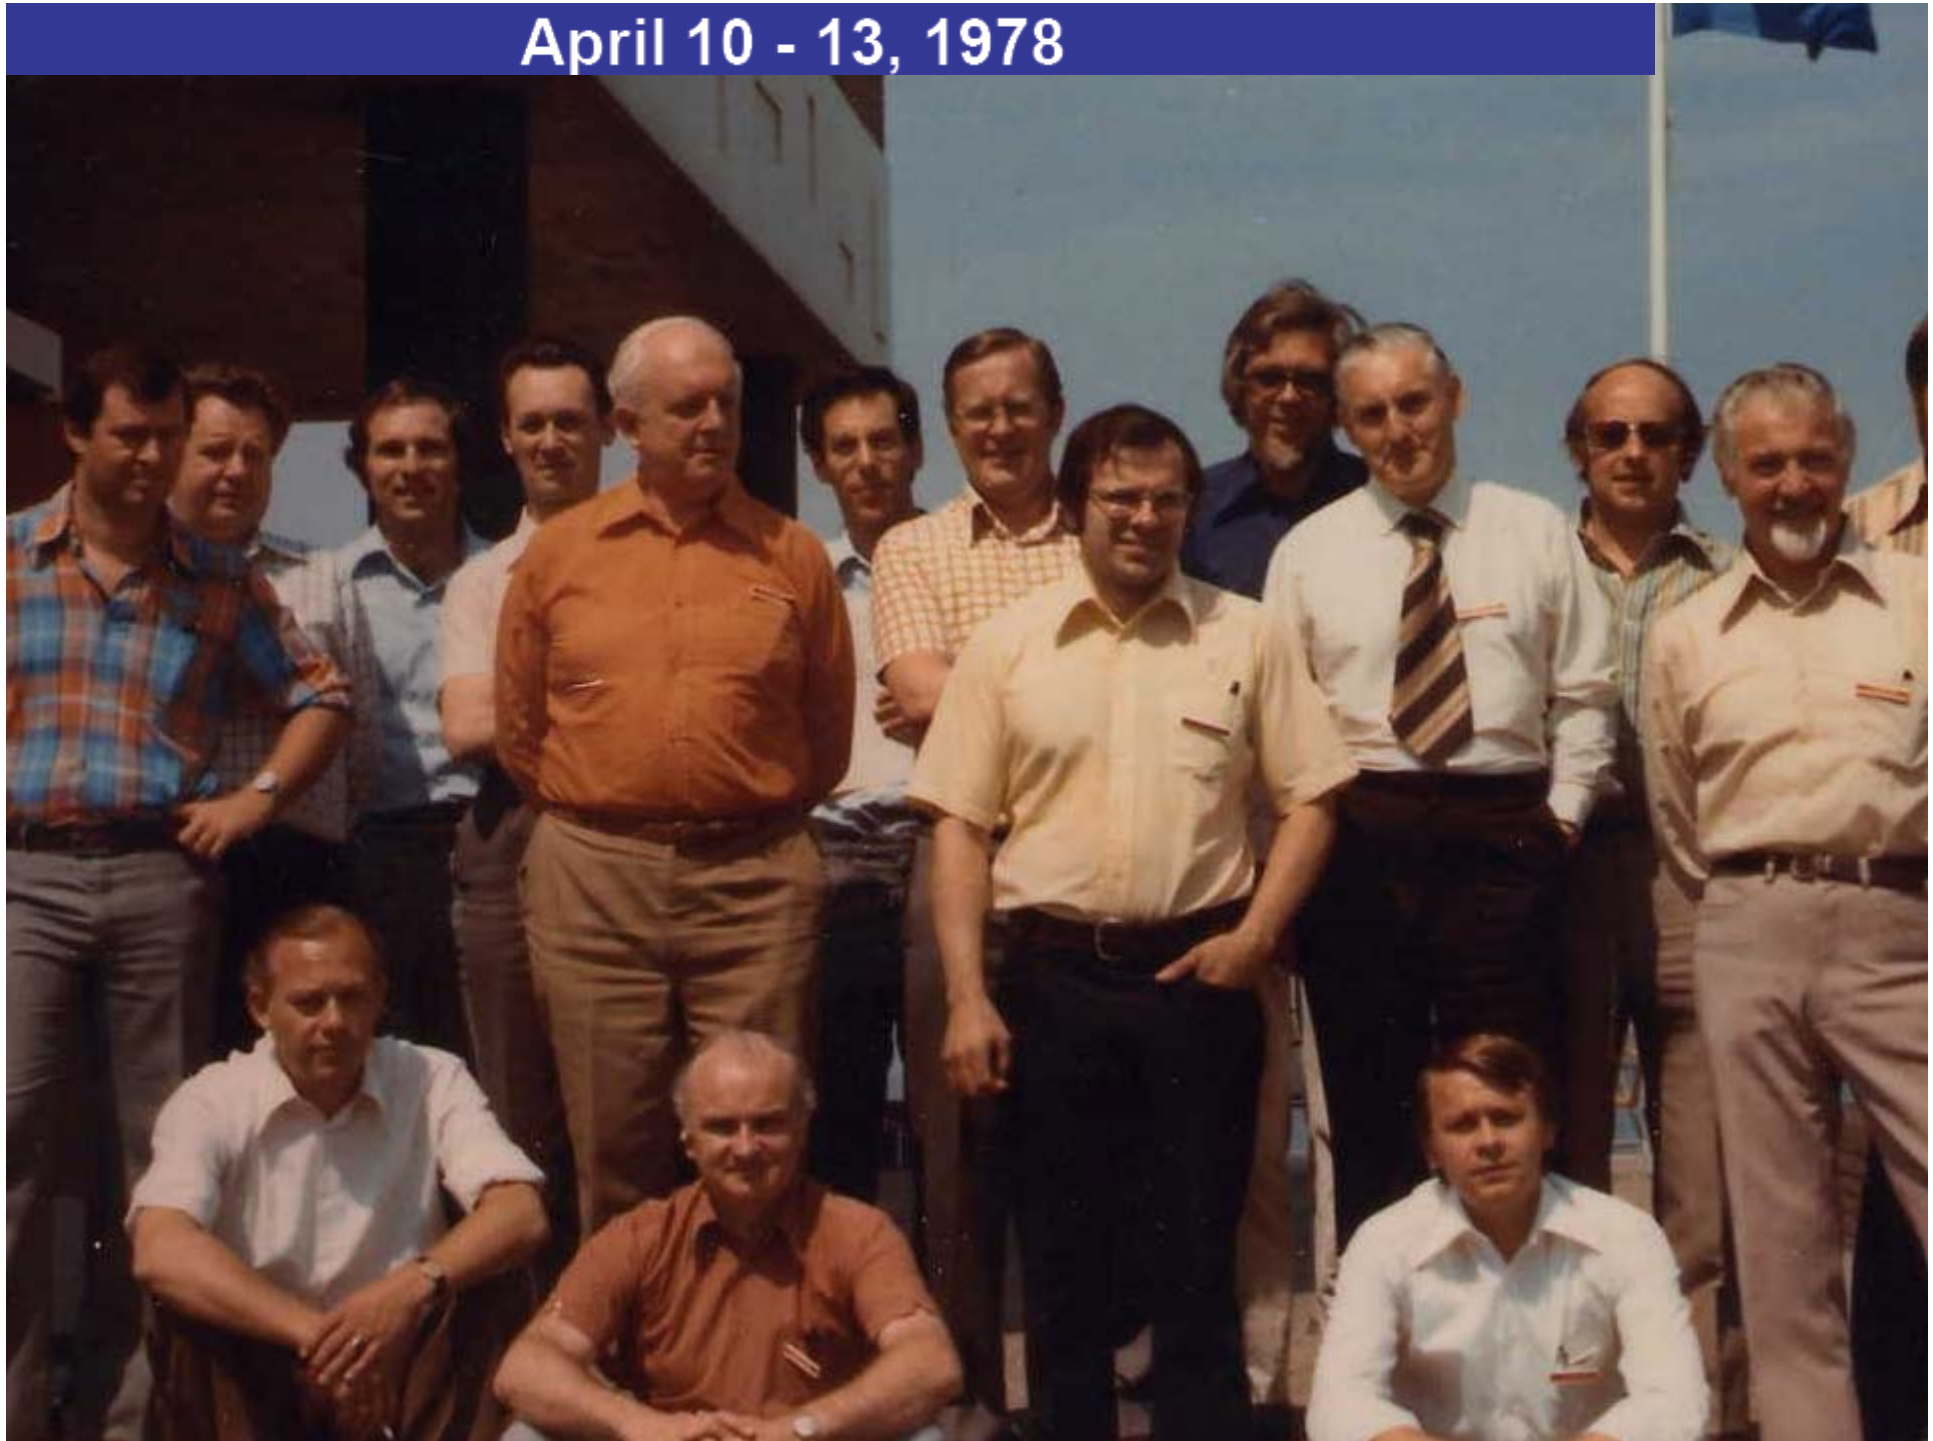

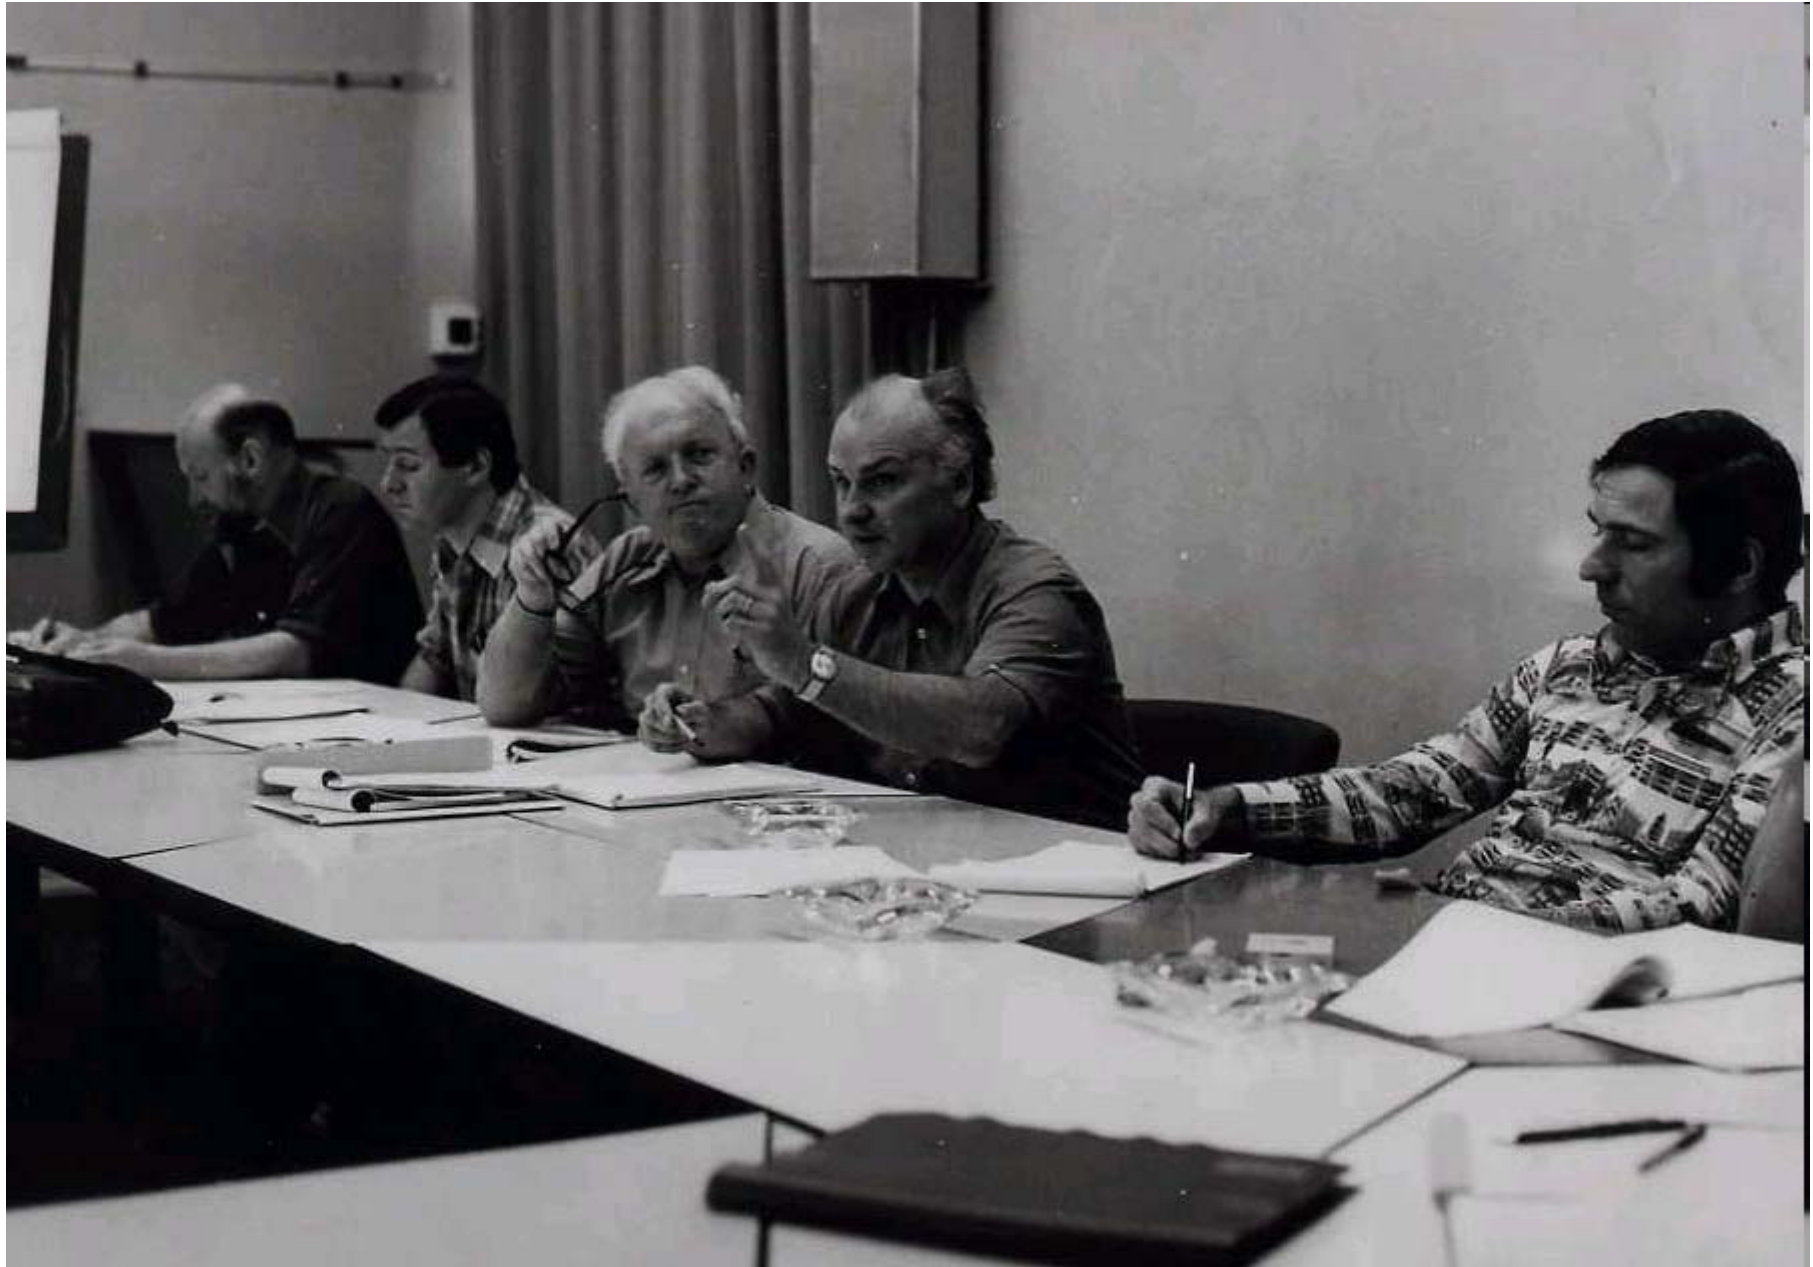

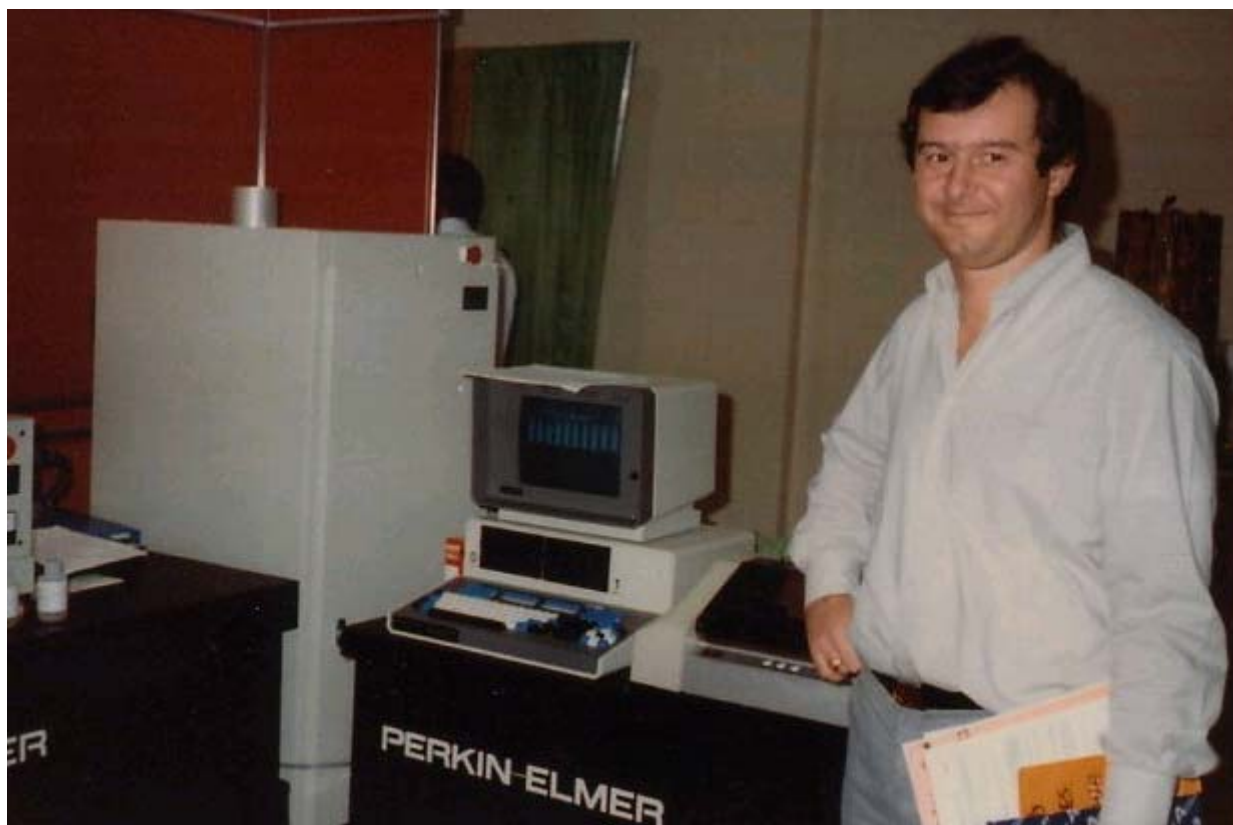

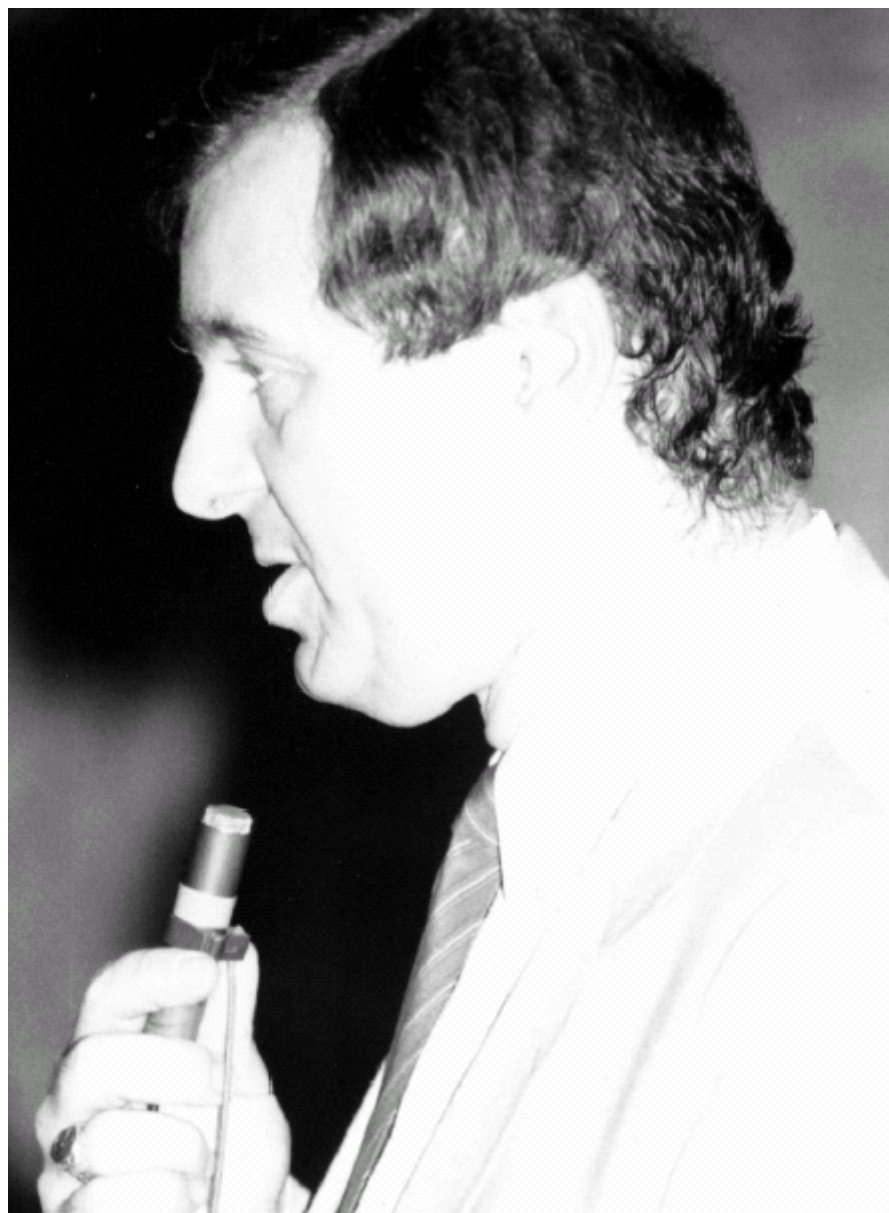

**1984 Winter Conference on Plasma Spectrochemistry  
San Diego**

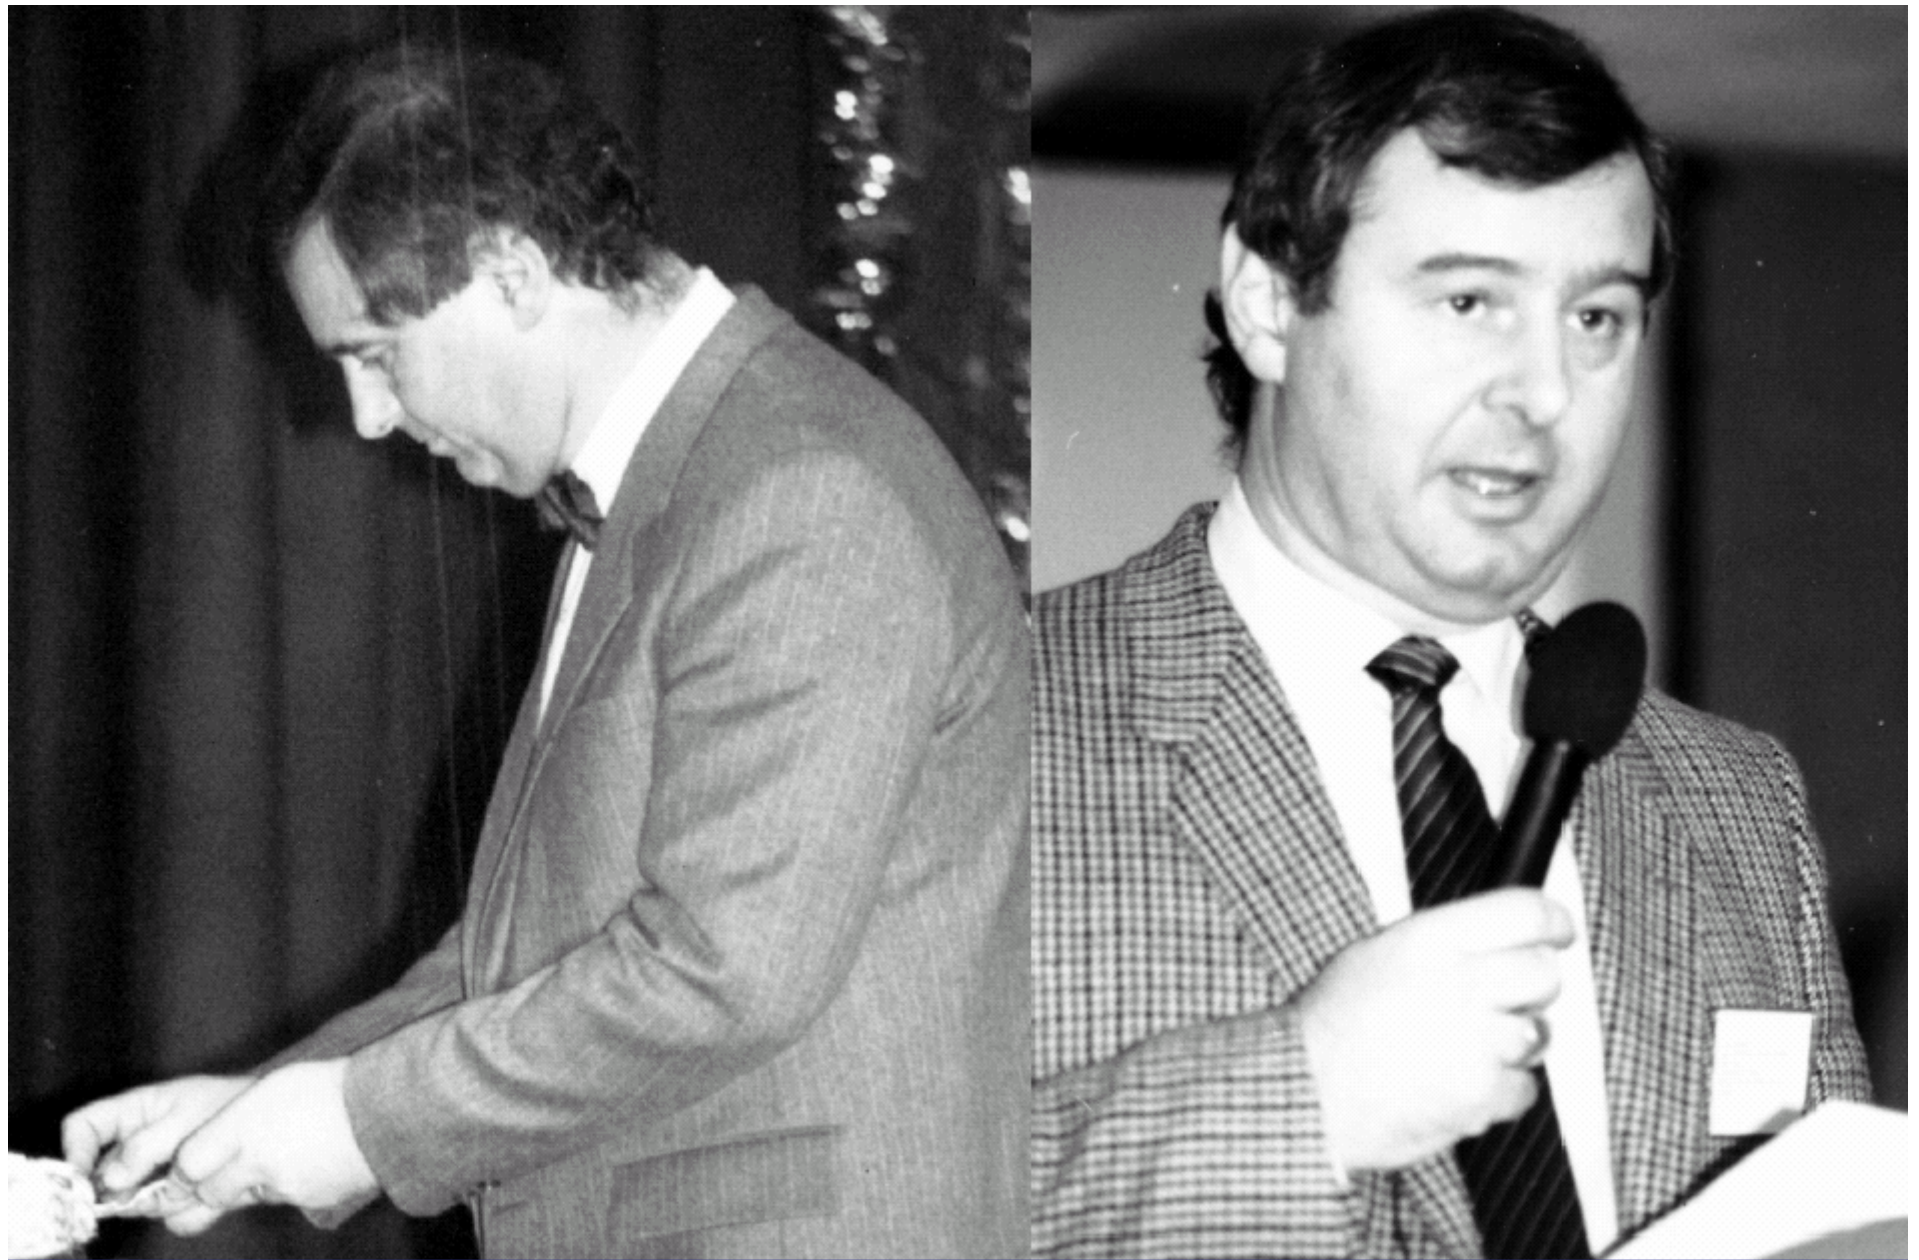

**1987 European Winter Conference on Plasma Spectrochemistry, Lyon, France**

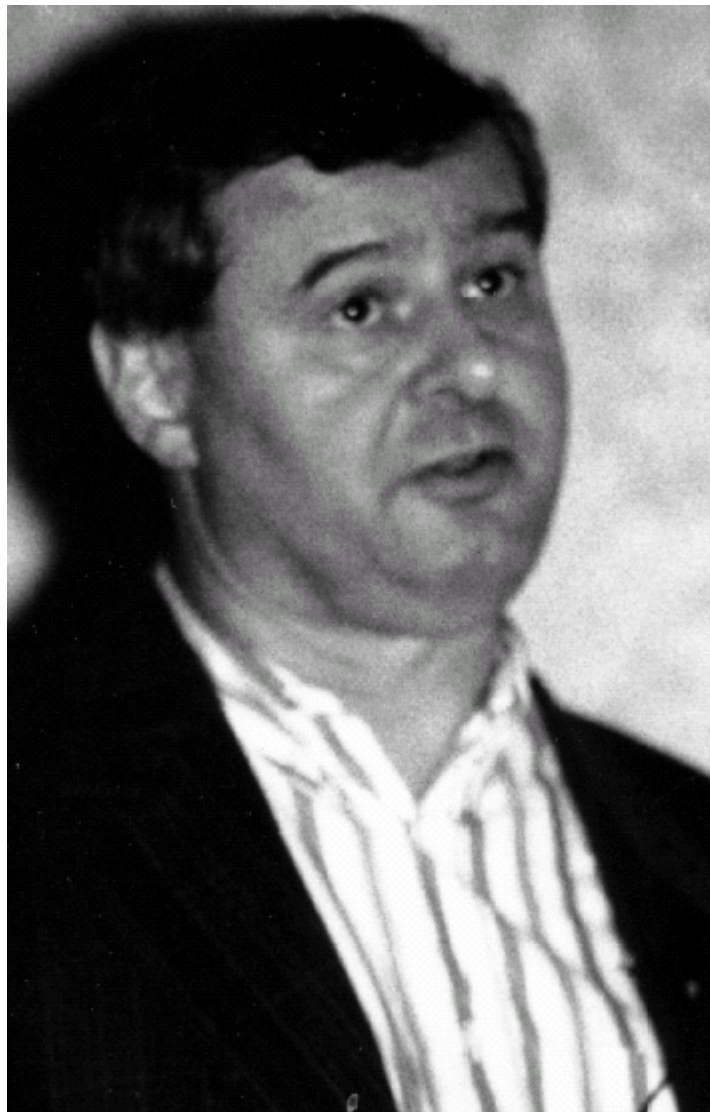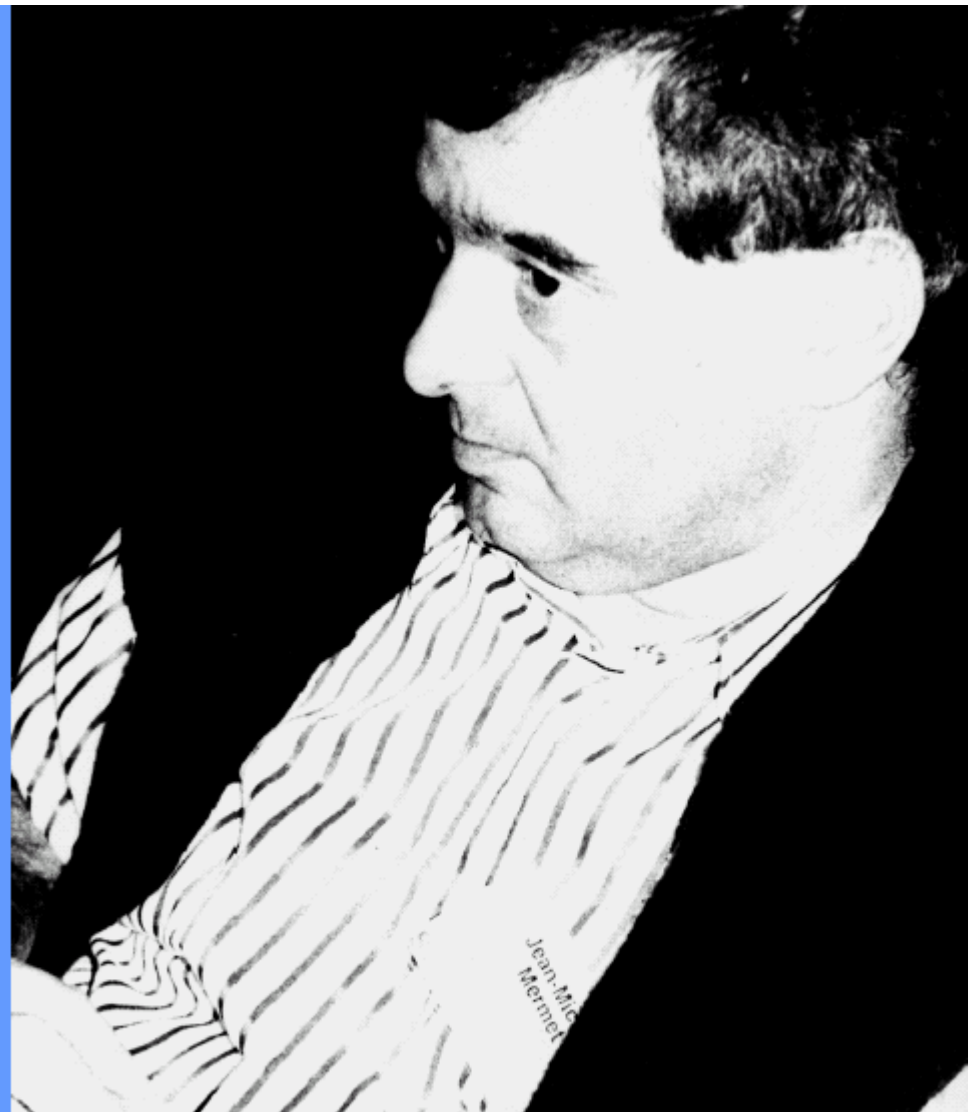

**1990 Winter Conference on Plasma Spectrochemistry  
St. Petersburg, Florida**

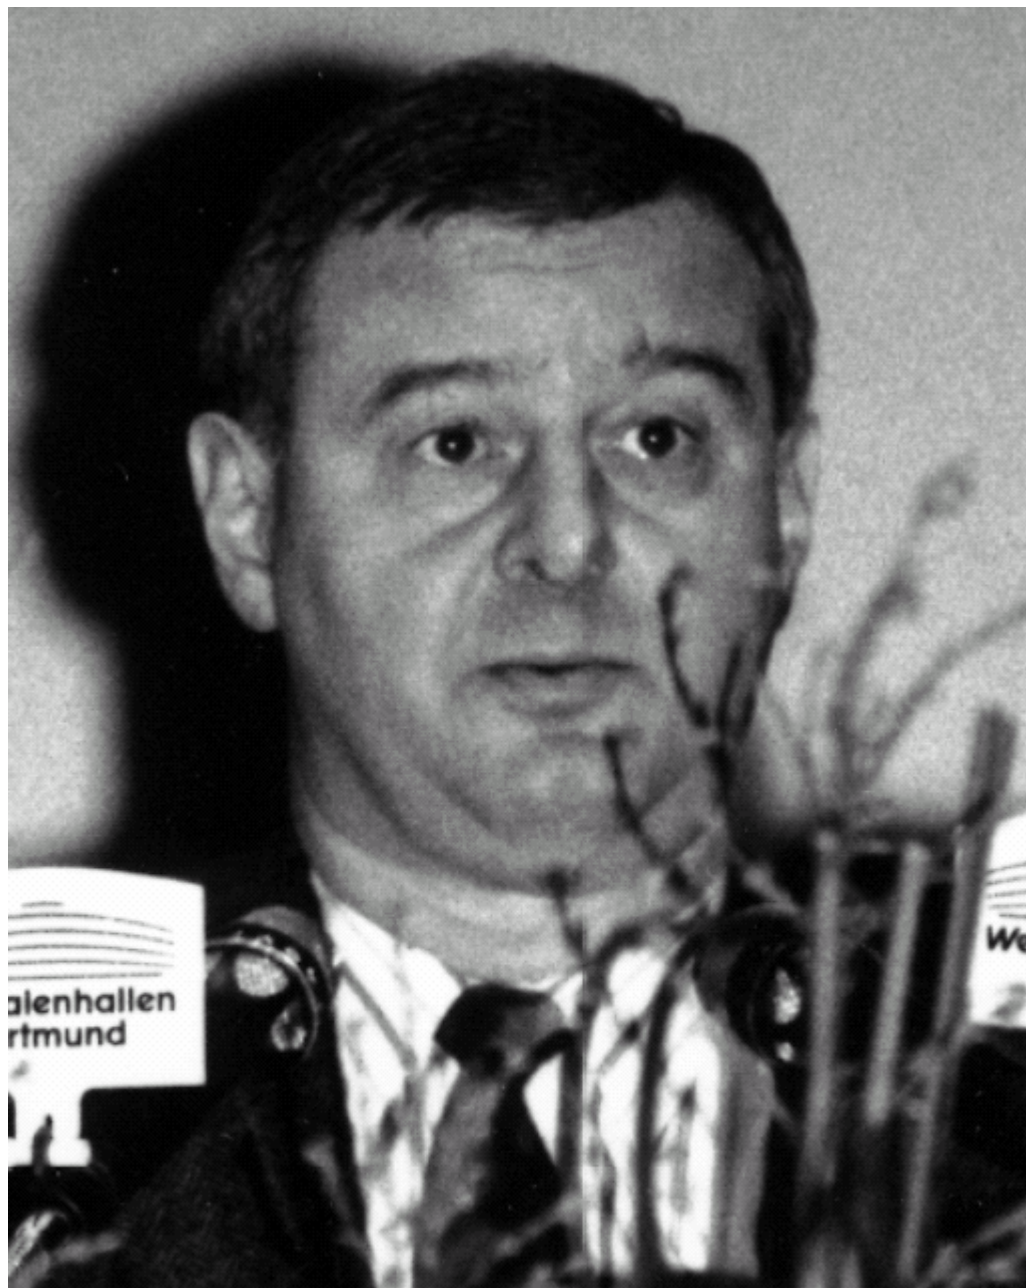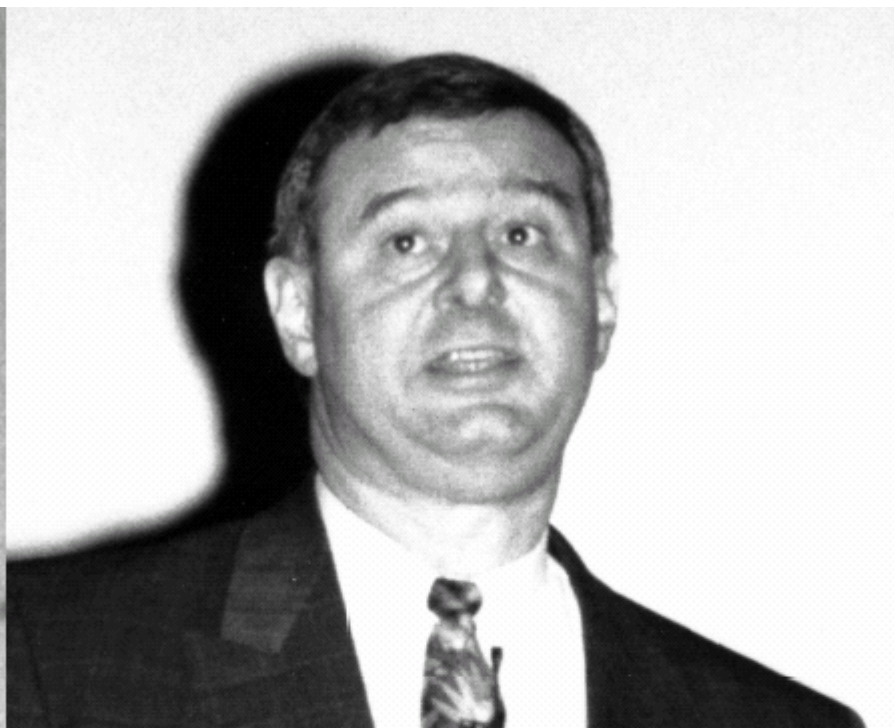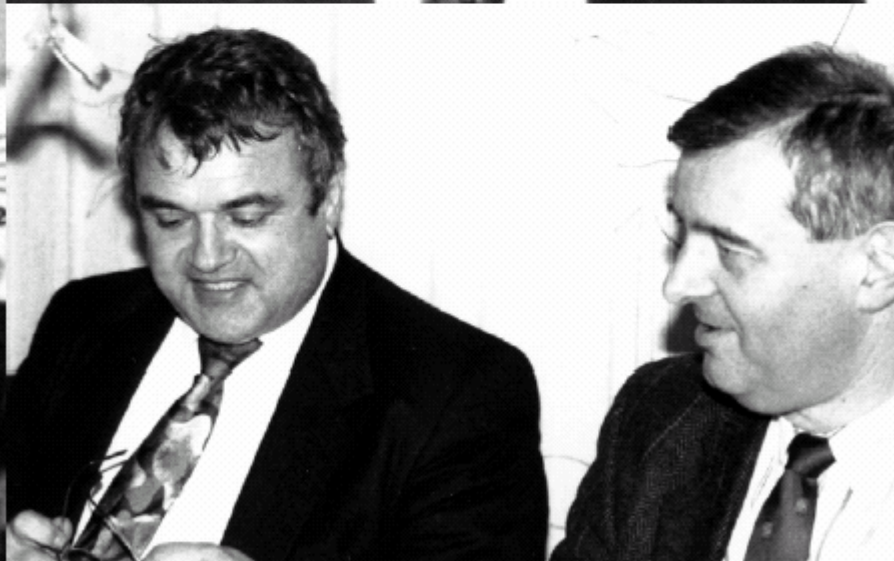

**1991 European Winter Conference on Plasma Spectrochemistry, Dortmund, Germany**

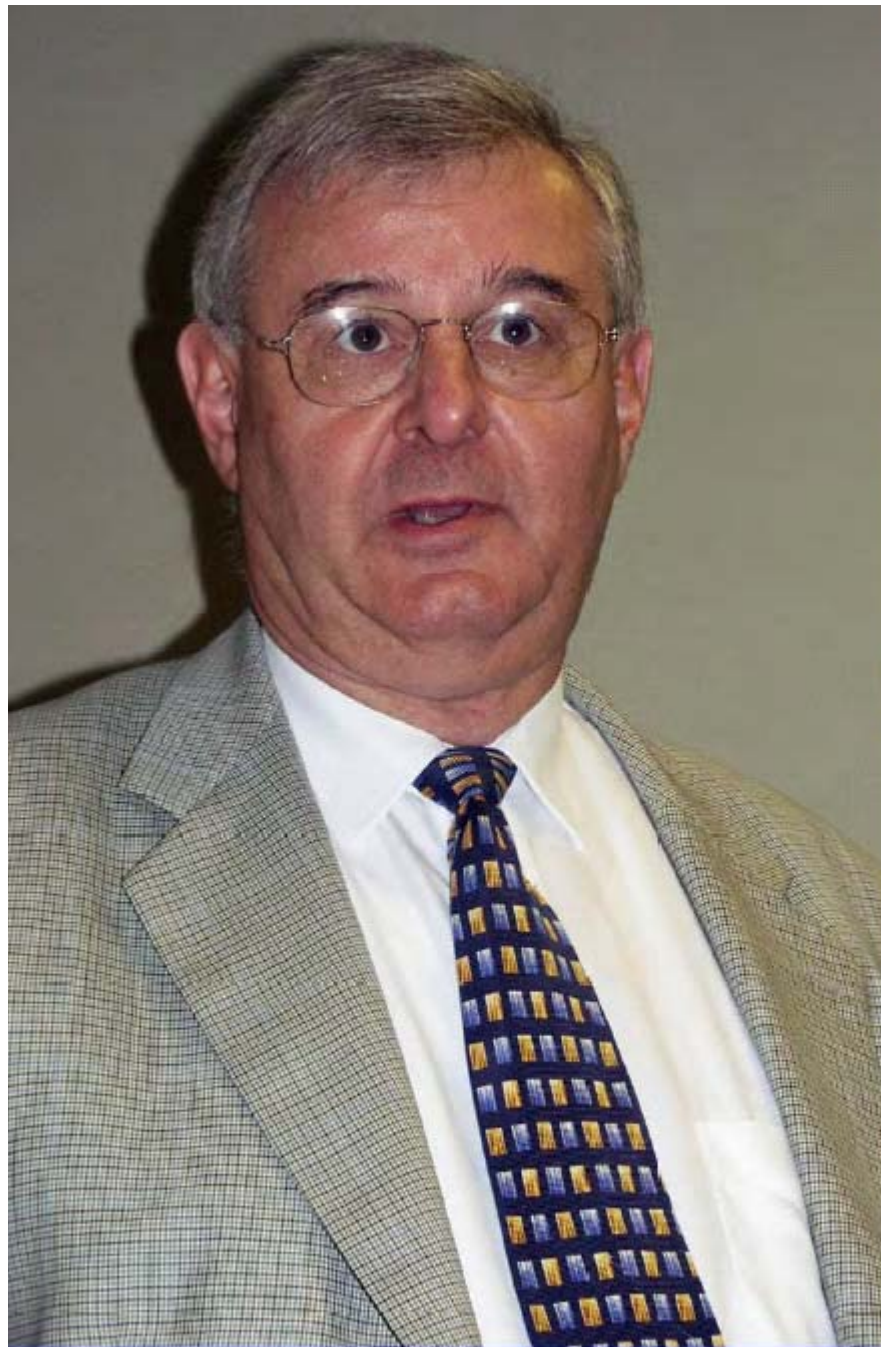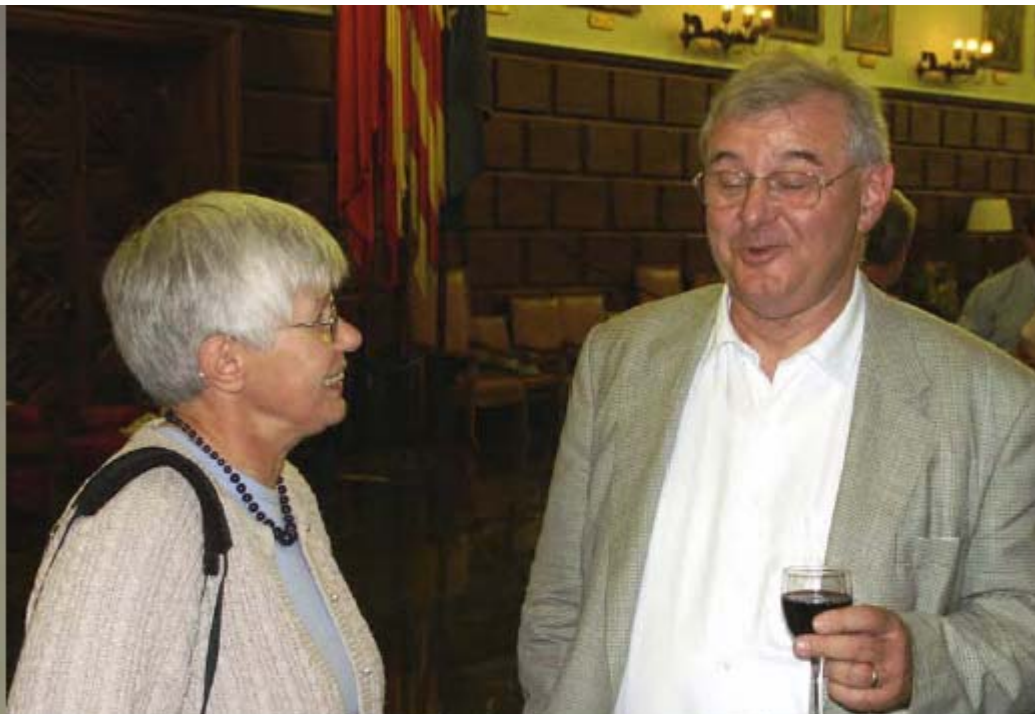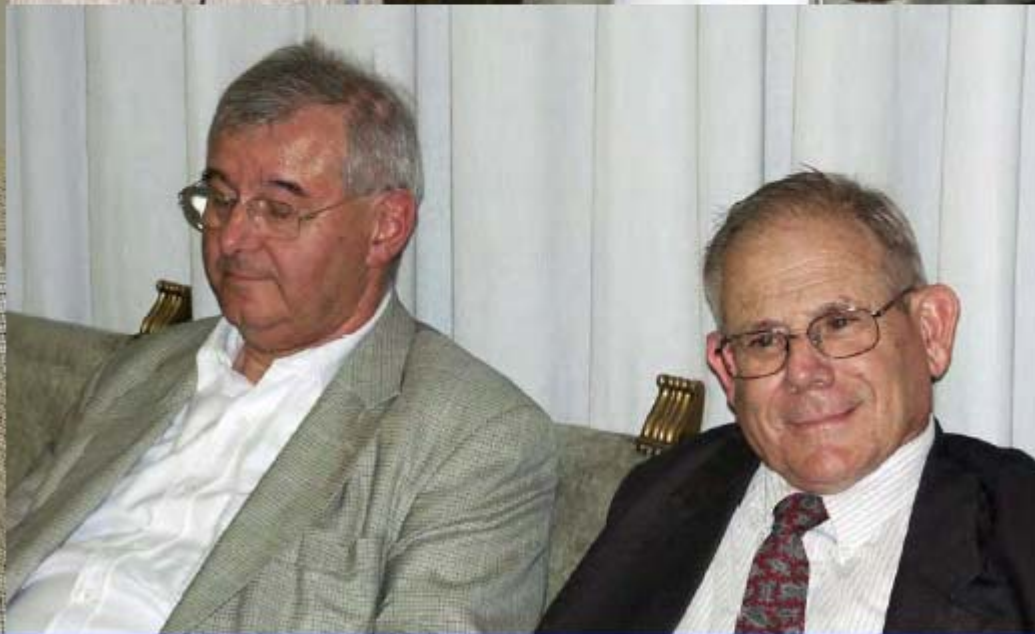

**Pre-CSI Symposium, Zaragoza, Spain, September 2003**



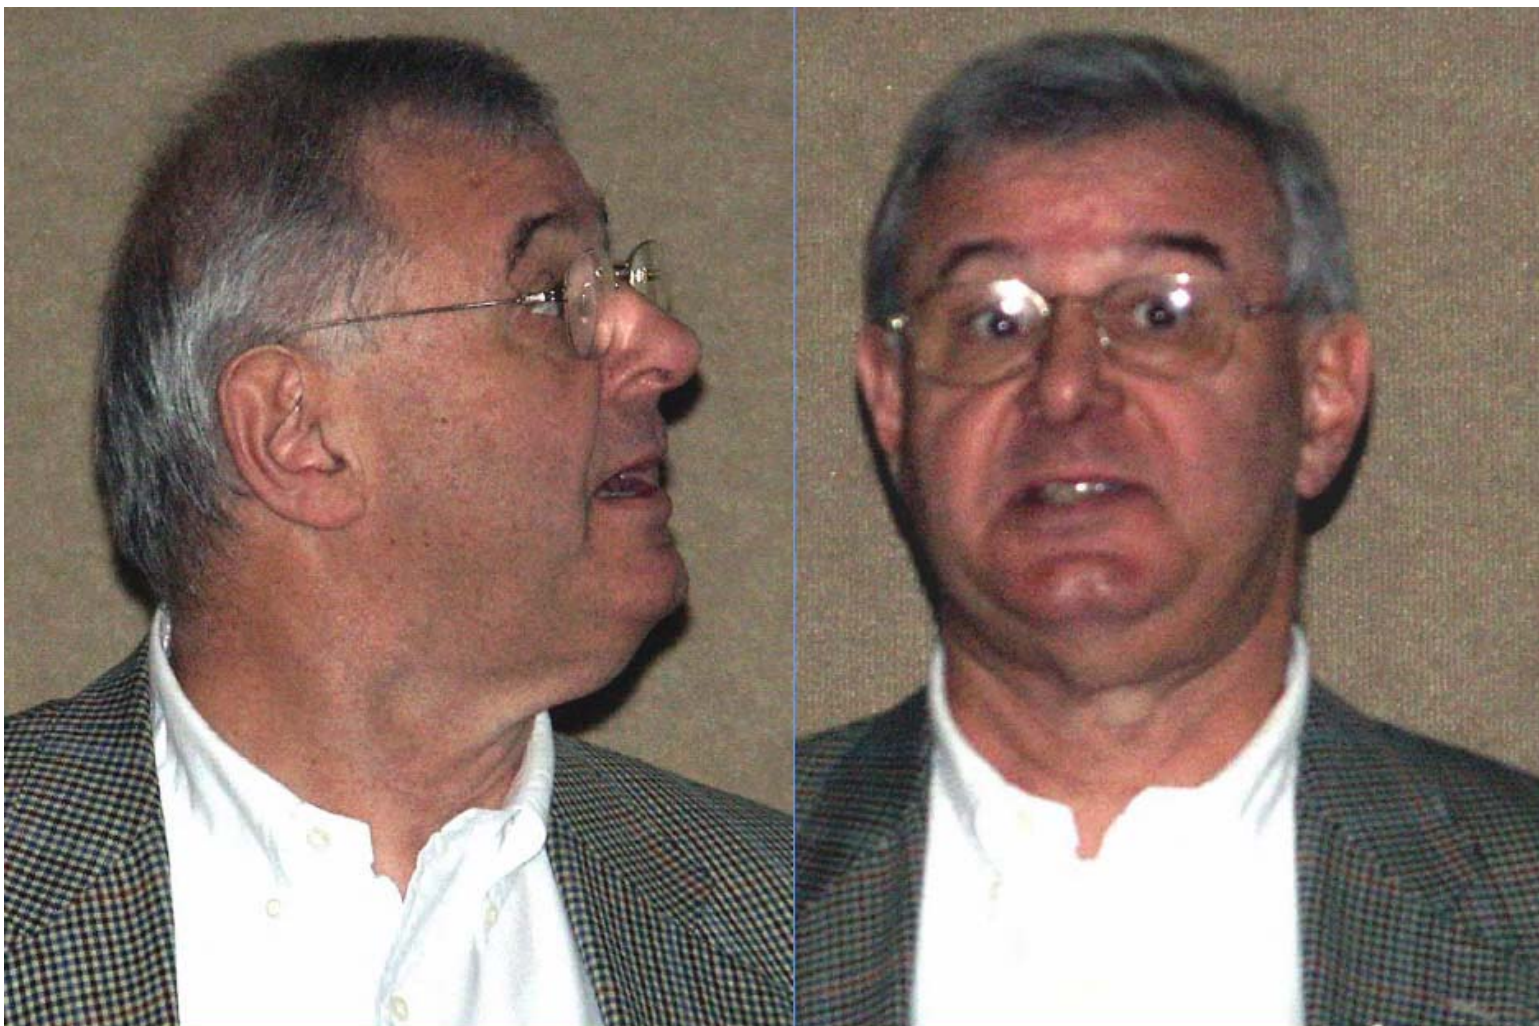

**2004 Winter Conference on Plasma Spectrochemistry  
Fort Lauderdale, Florida**

This seems to be taken from the police files!

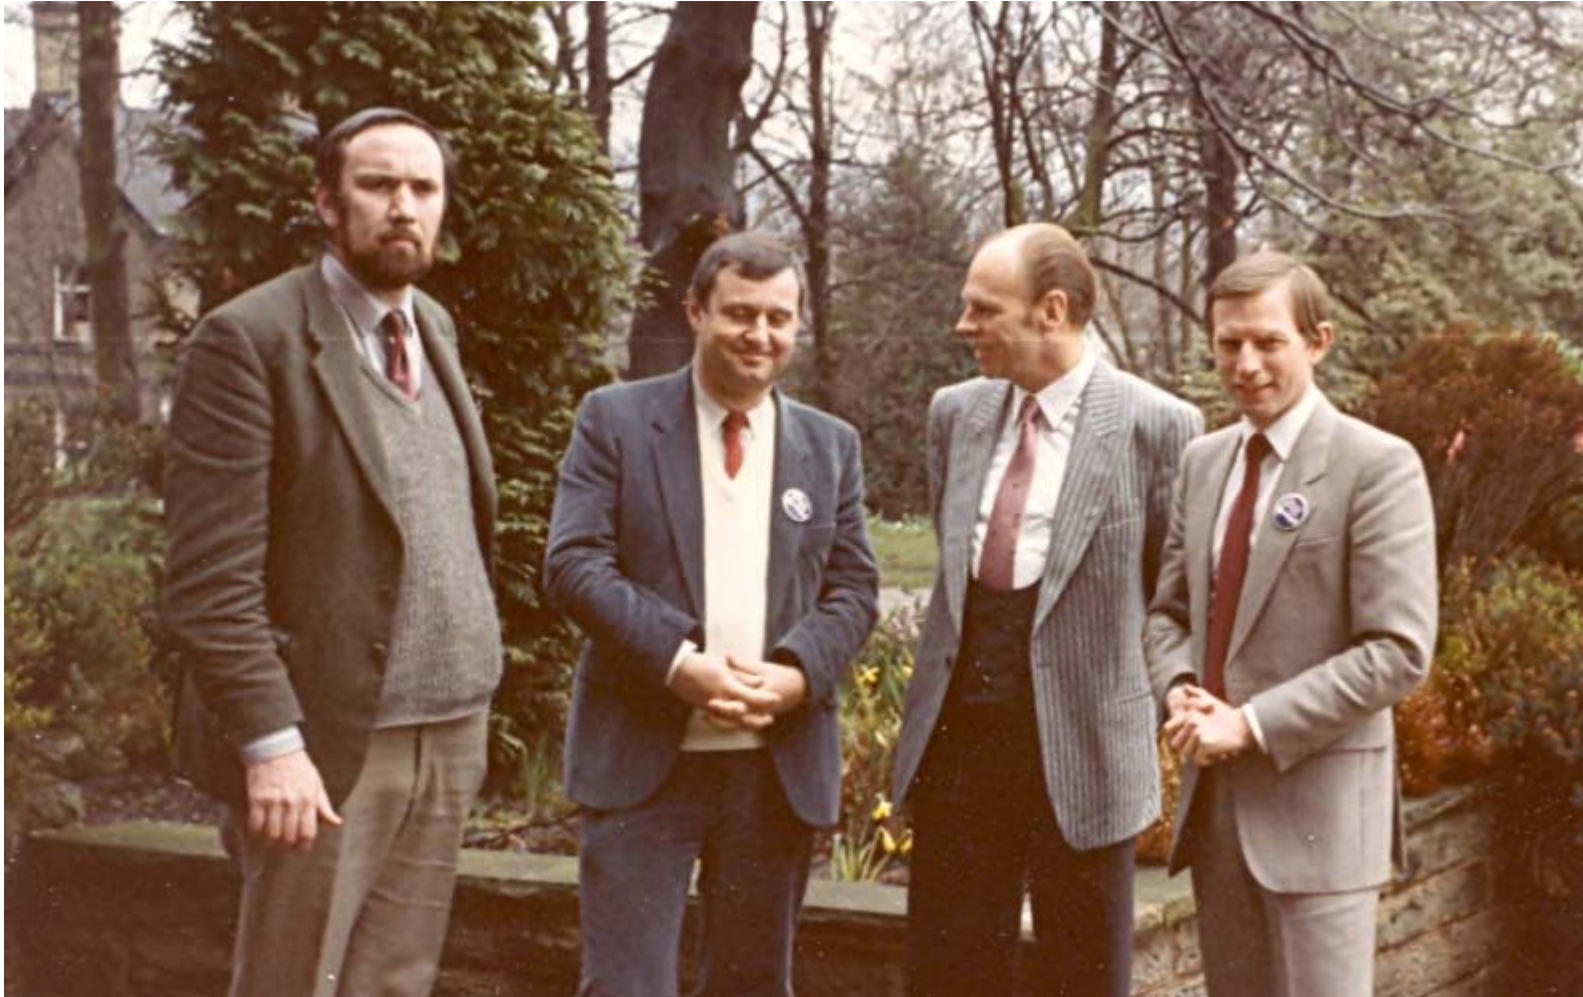

At an ASU meeting with Malcolm Cresser (left), Bernhard Welz and Barry Sharp.

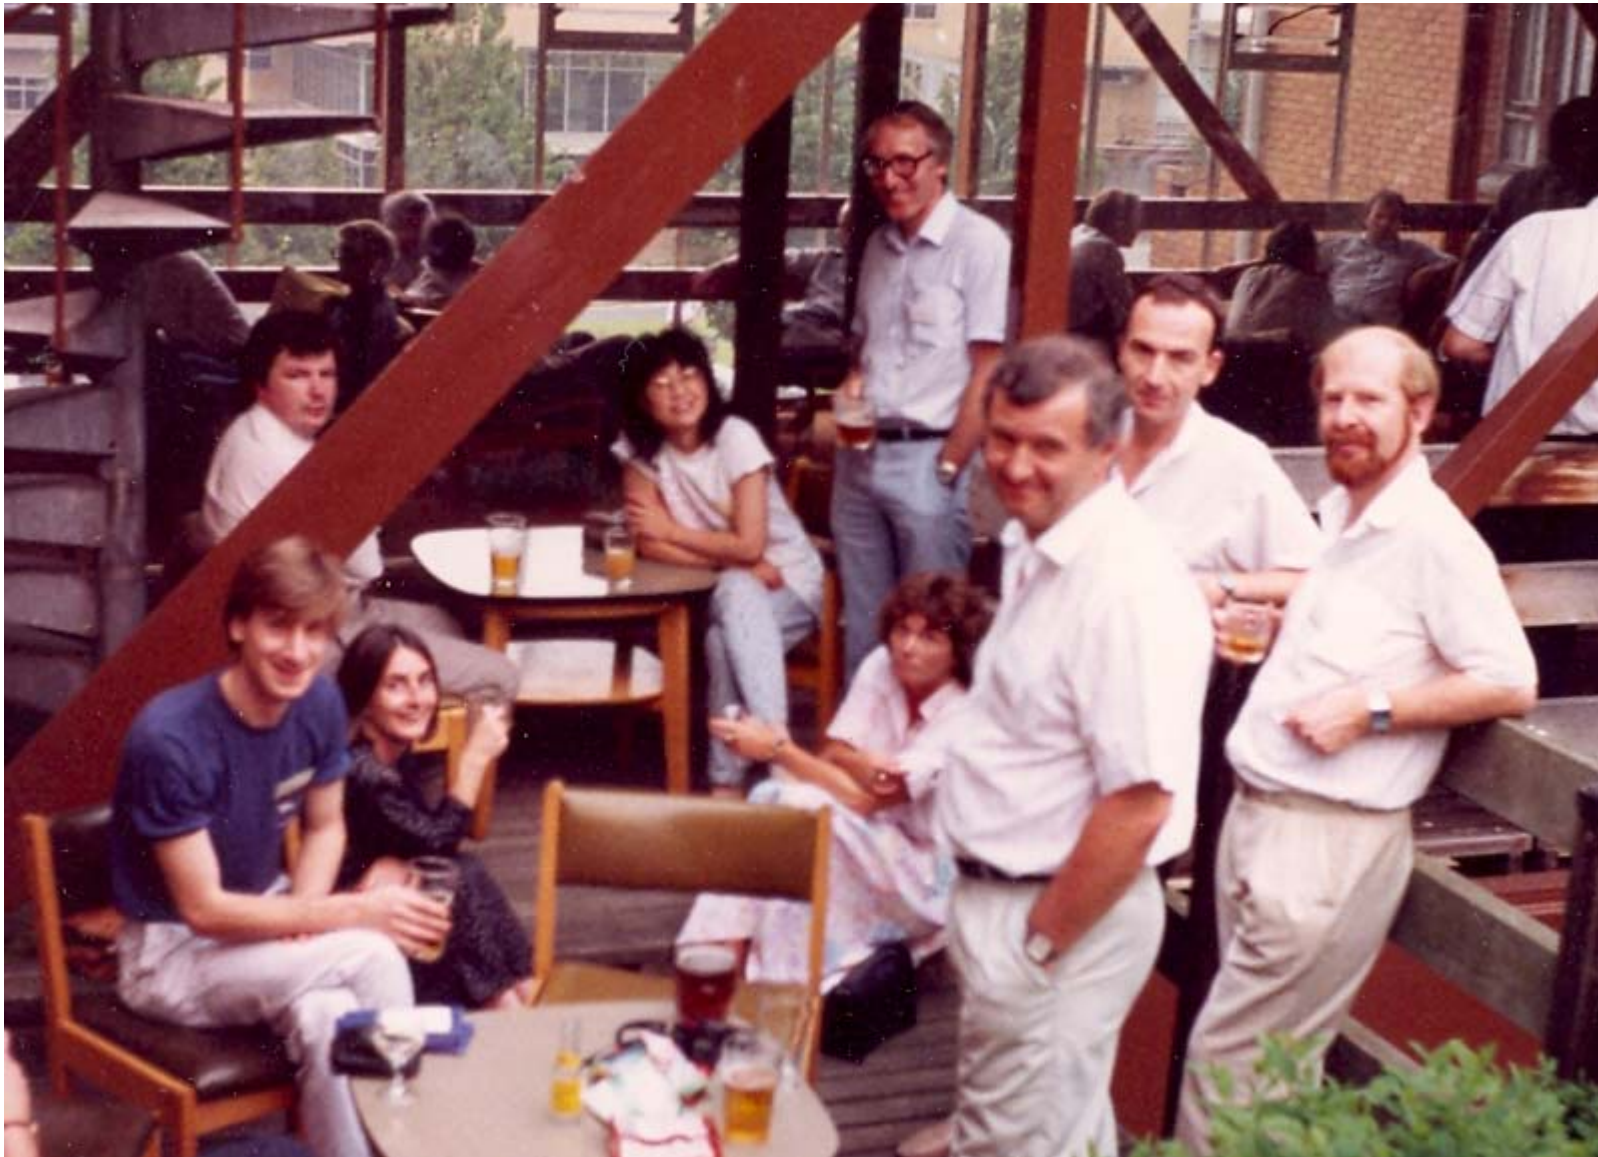

Jean-Michel relaxing at the ICP-MS CSI post-symposium, Canada, 1987.

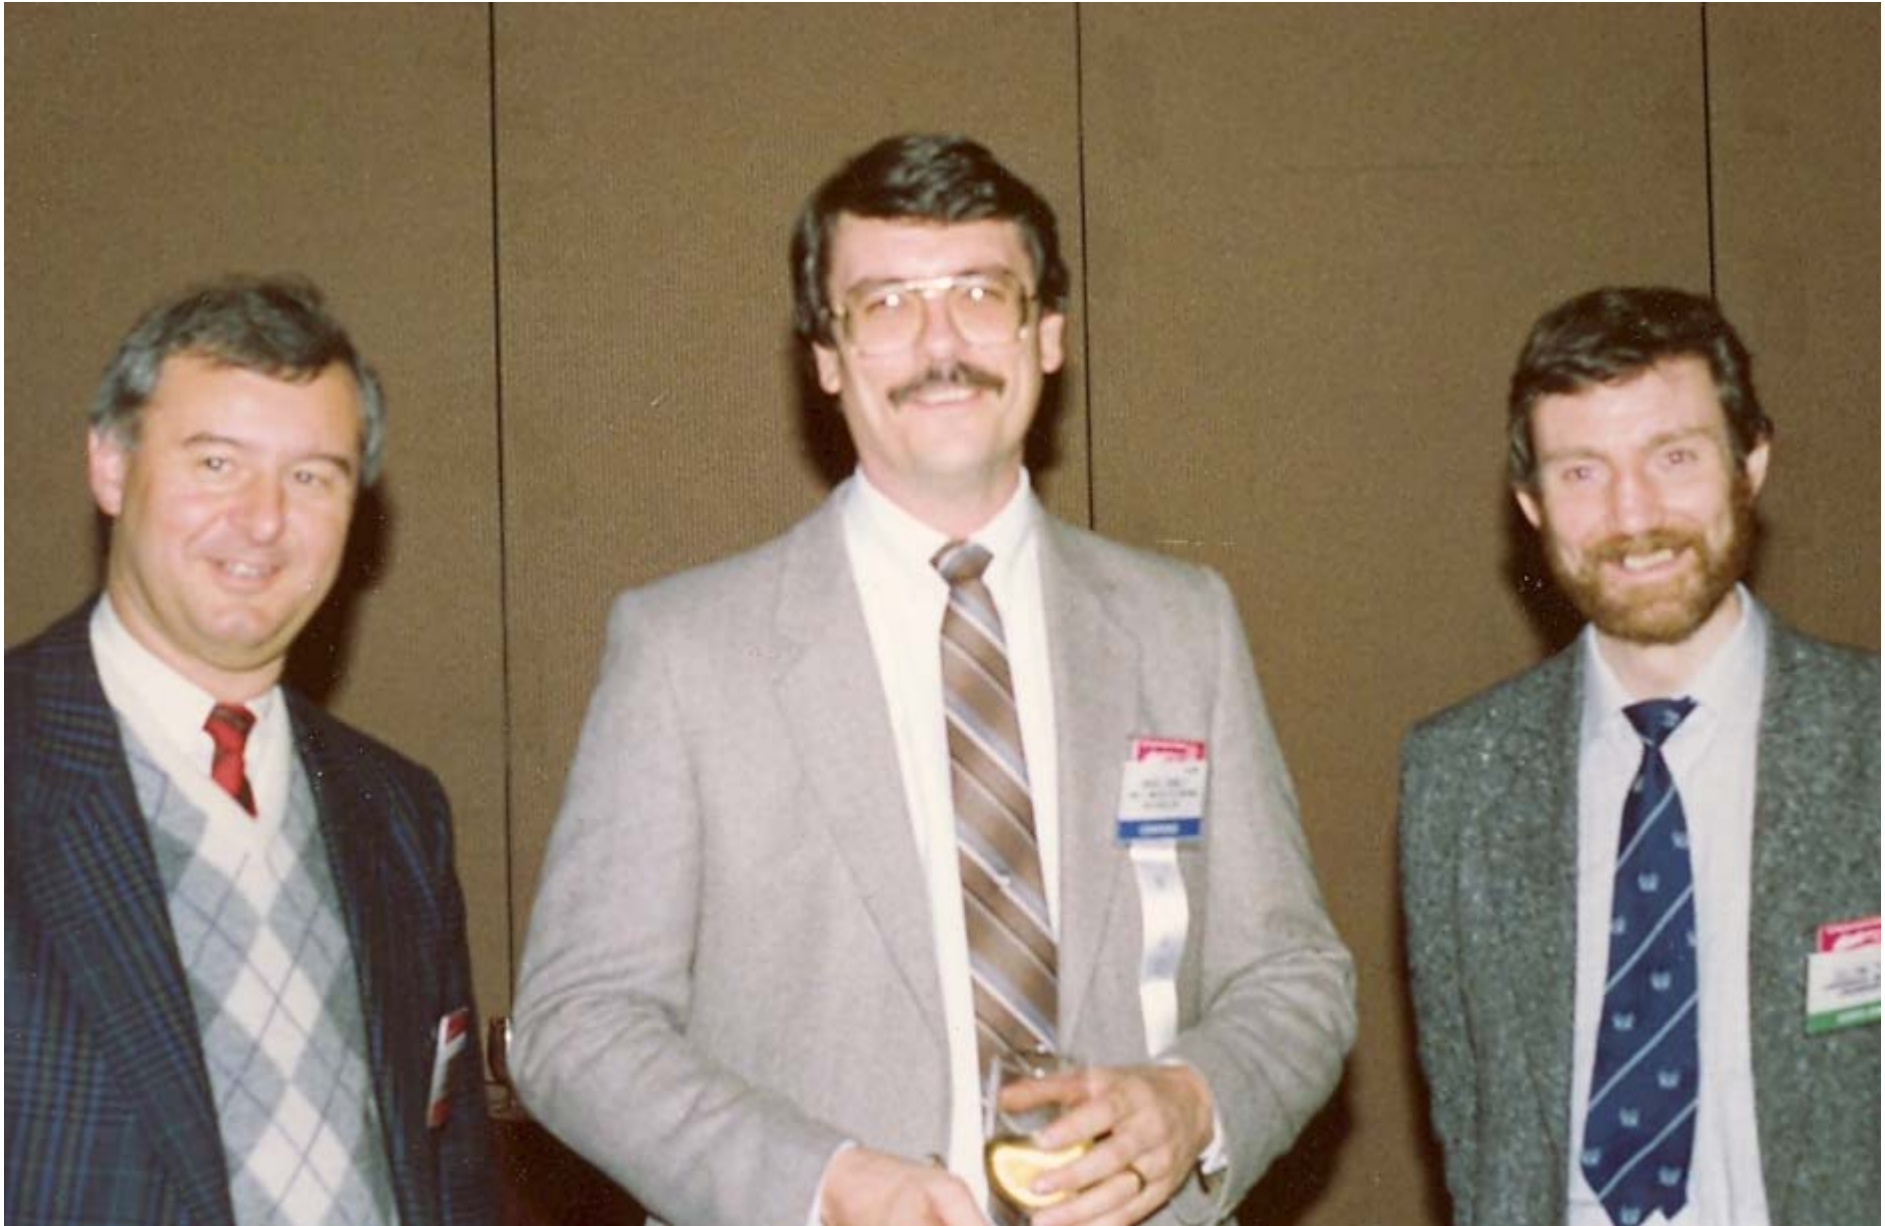

With Jim Harnly (centre) and Julian Tyson at a reception at a PittCon.

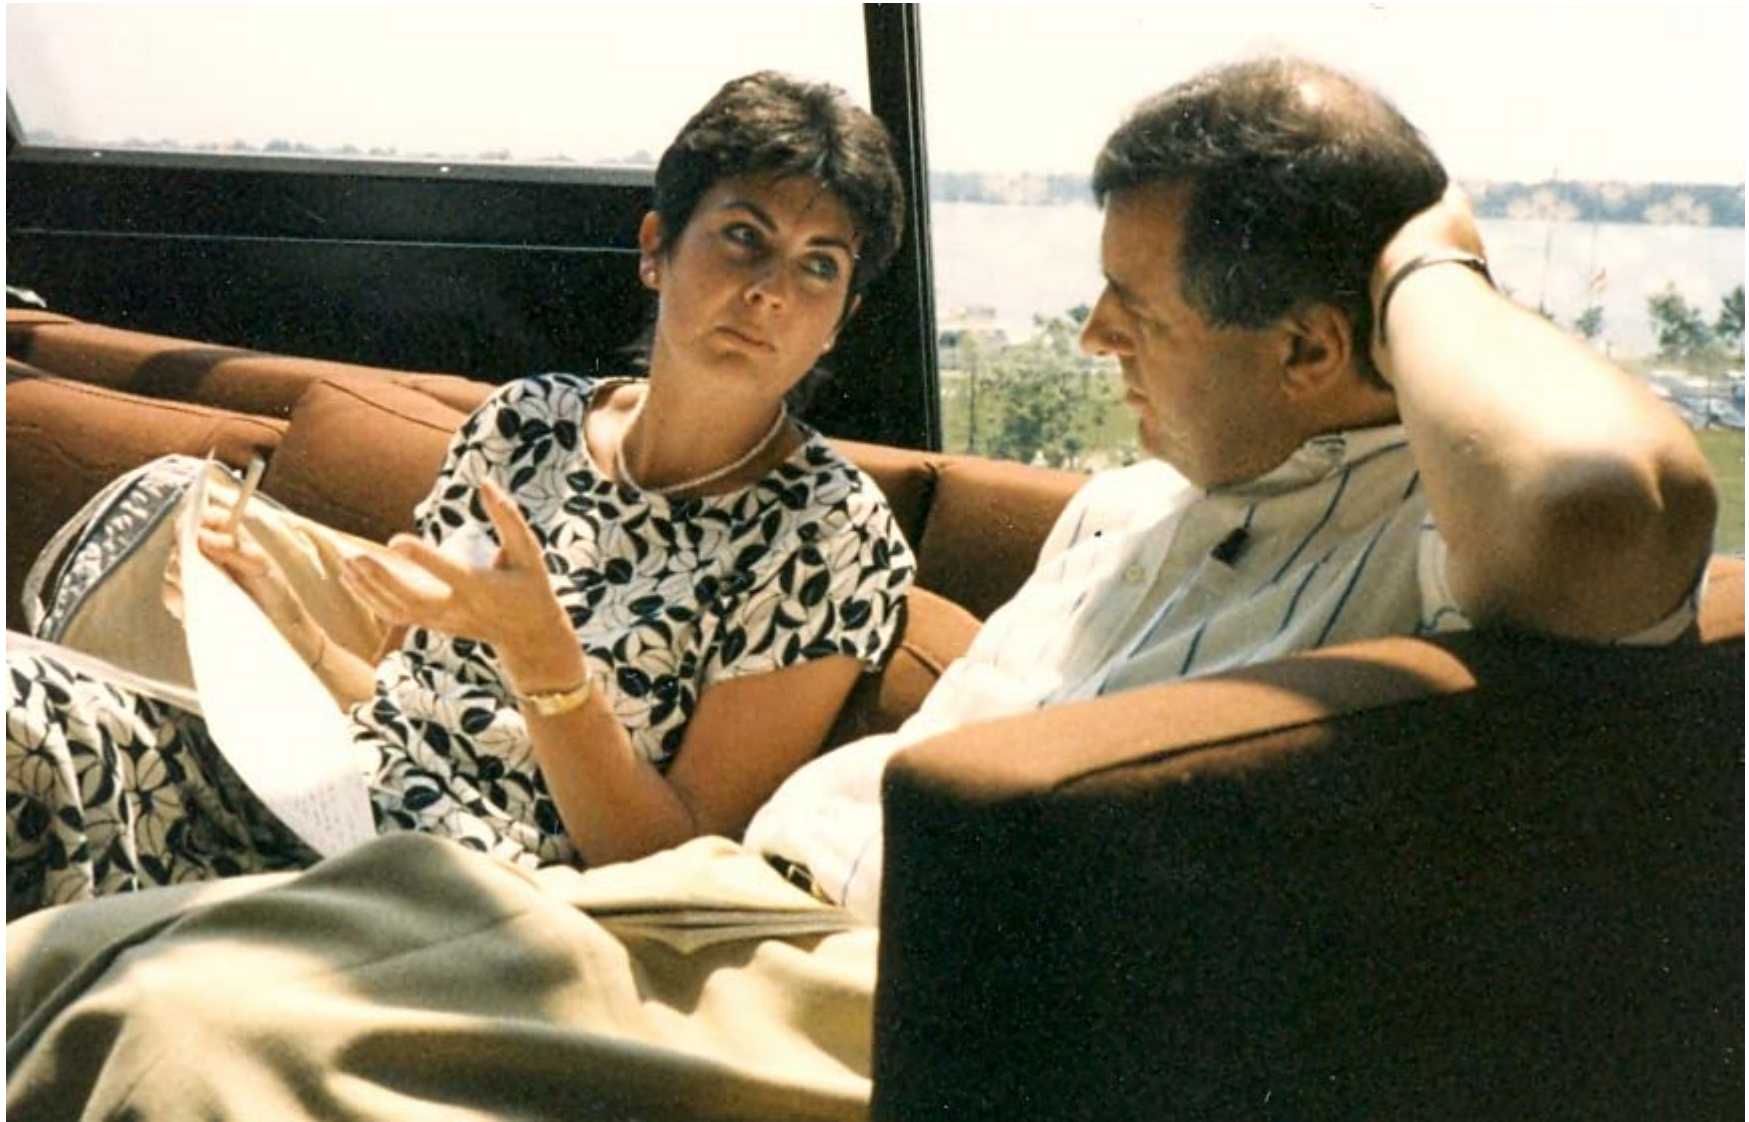

Discussing editorial matters with Judith at CSI Toronto, 1987.

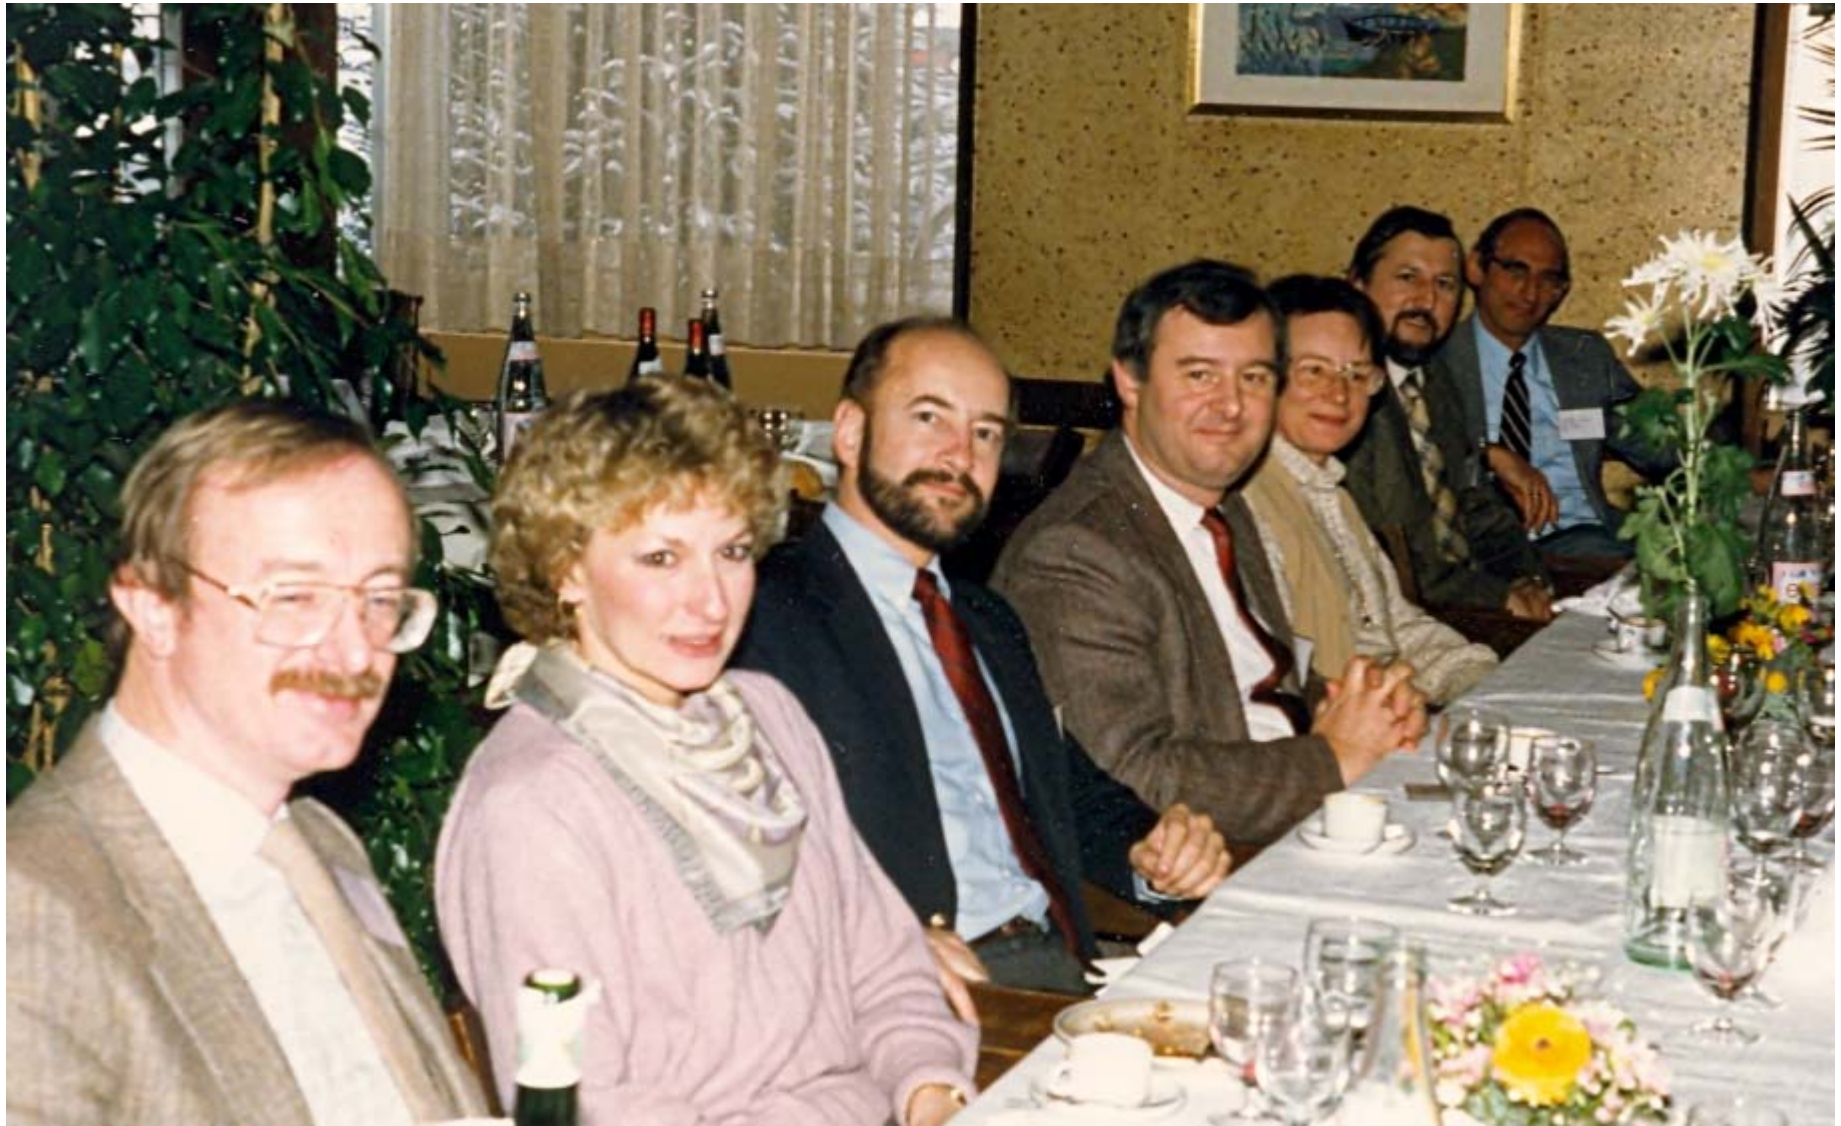

Winter Plasma Conference , Lyon, 1987, JAAS Editorial Board lunch  
(Rick Browner, Susan and Gary Hieftje, Lazslo Bezur, Ray Barnes

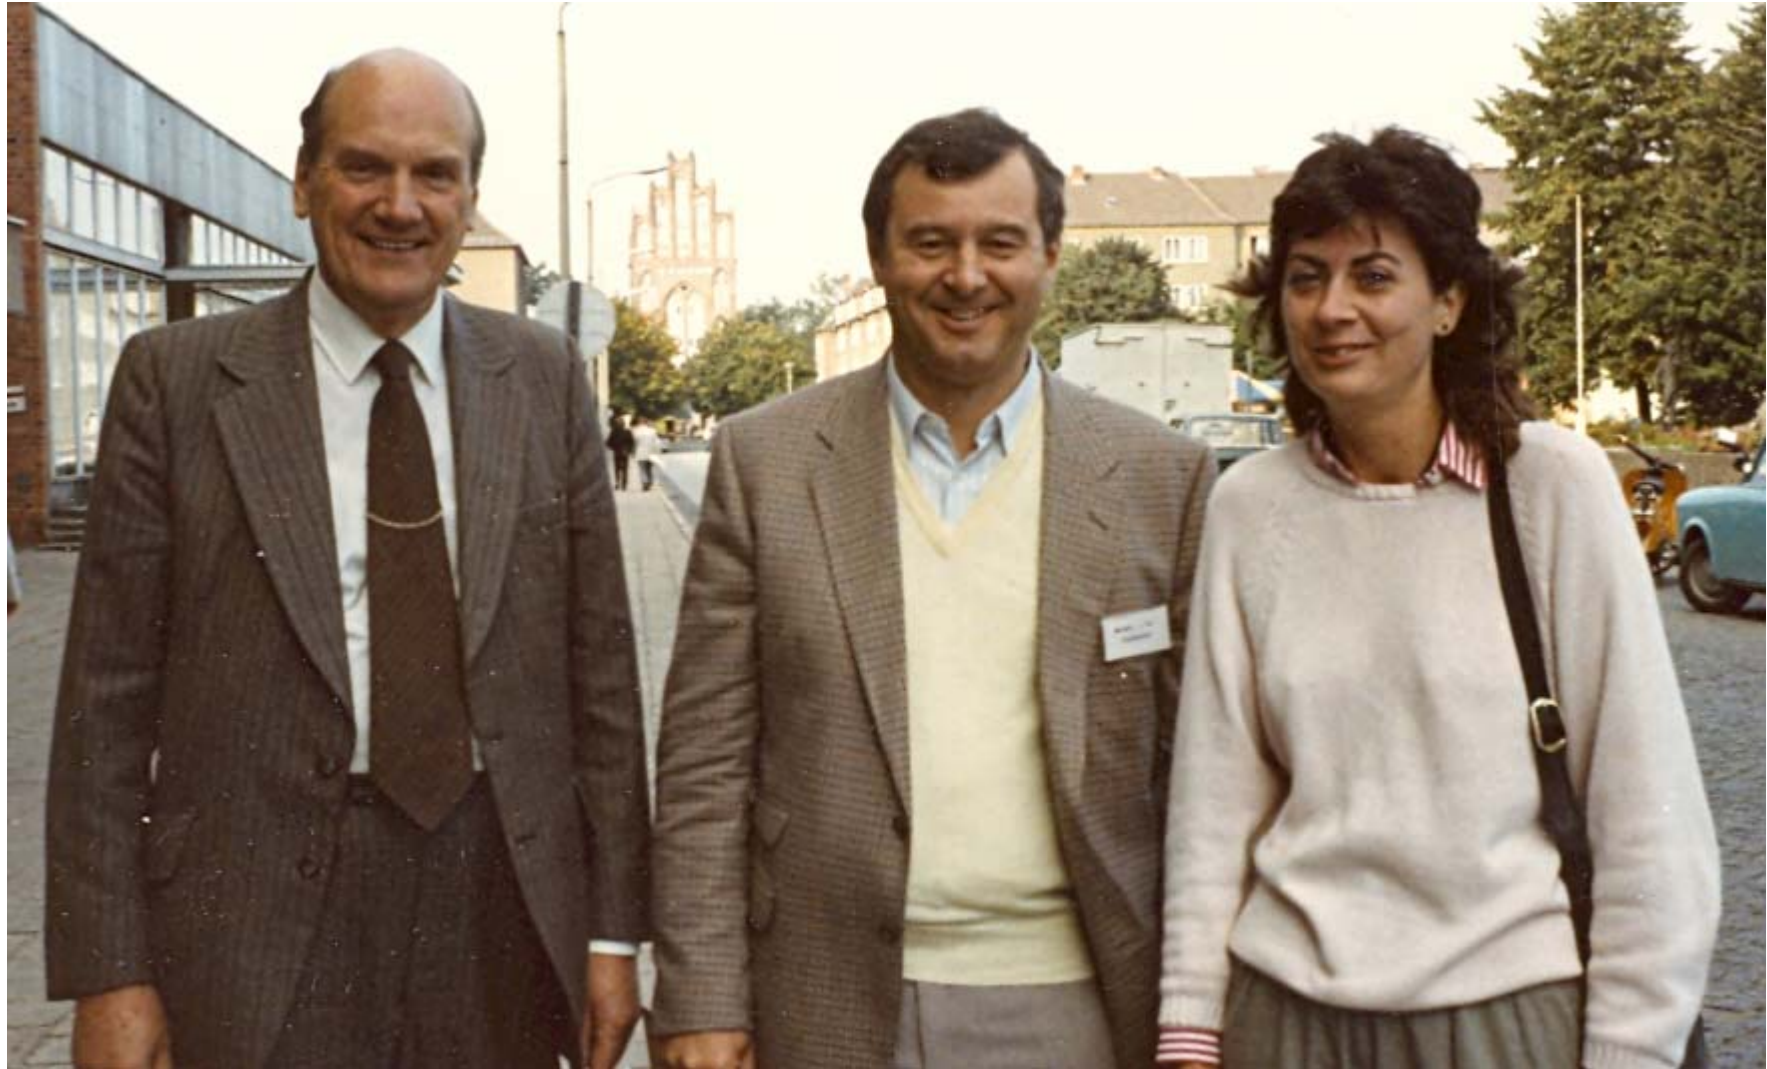

Neu Brandenburg, former East Germany, Analytiktreffen, 1986, with Alan Gray, and Judith.

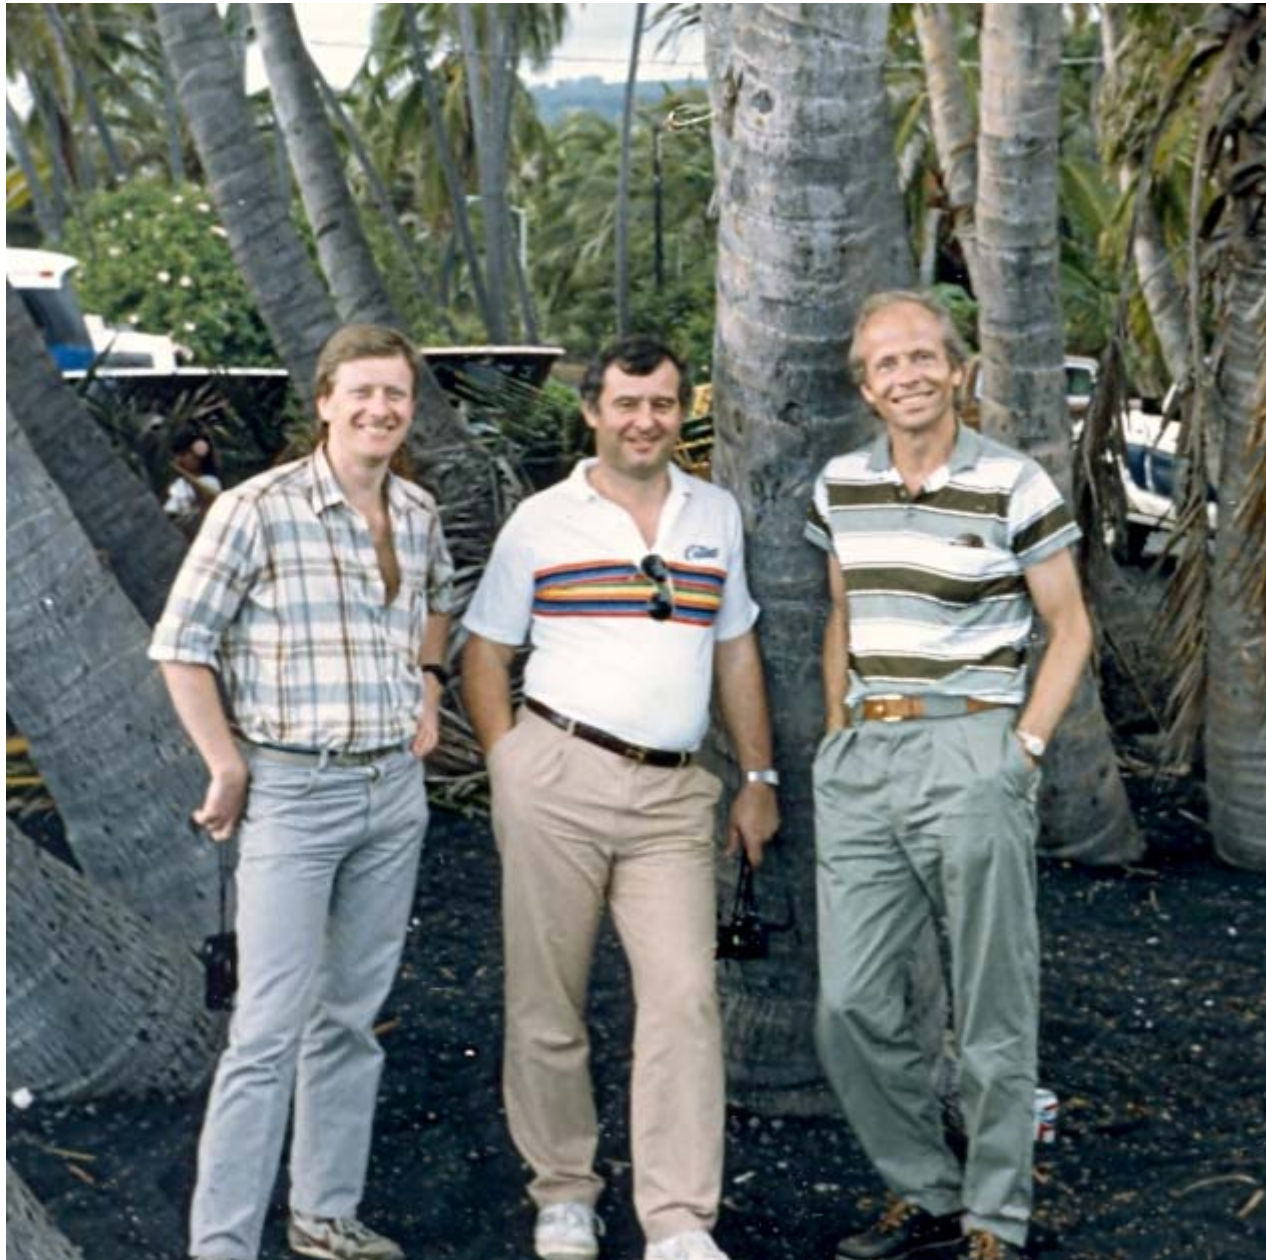

Winter Plasma Conference, 1986, Hawaii, with Dick Snook (left) and Gunther Knapp.



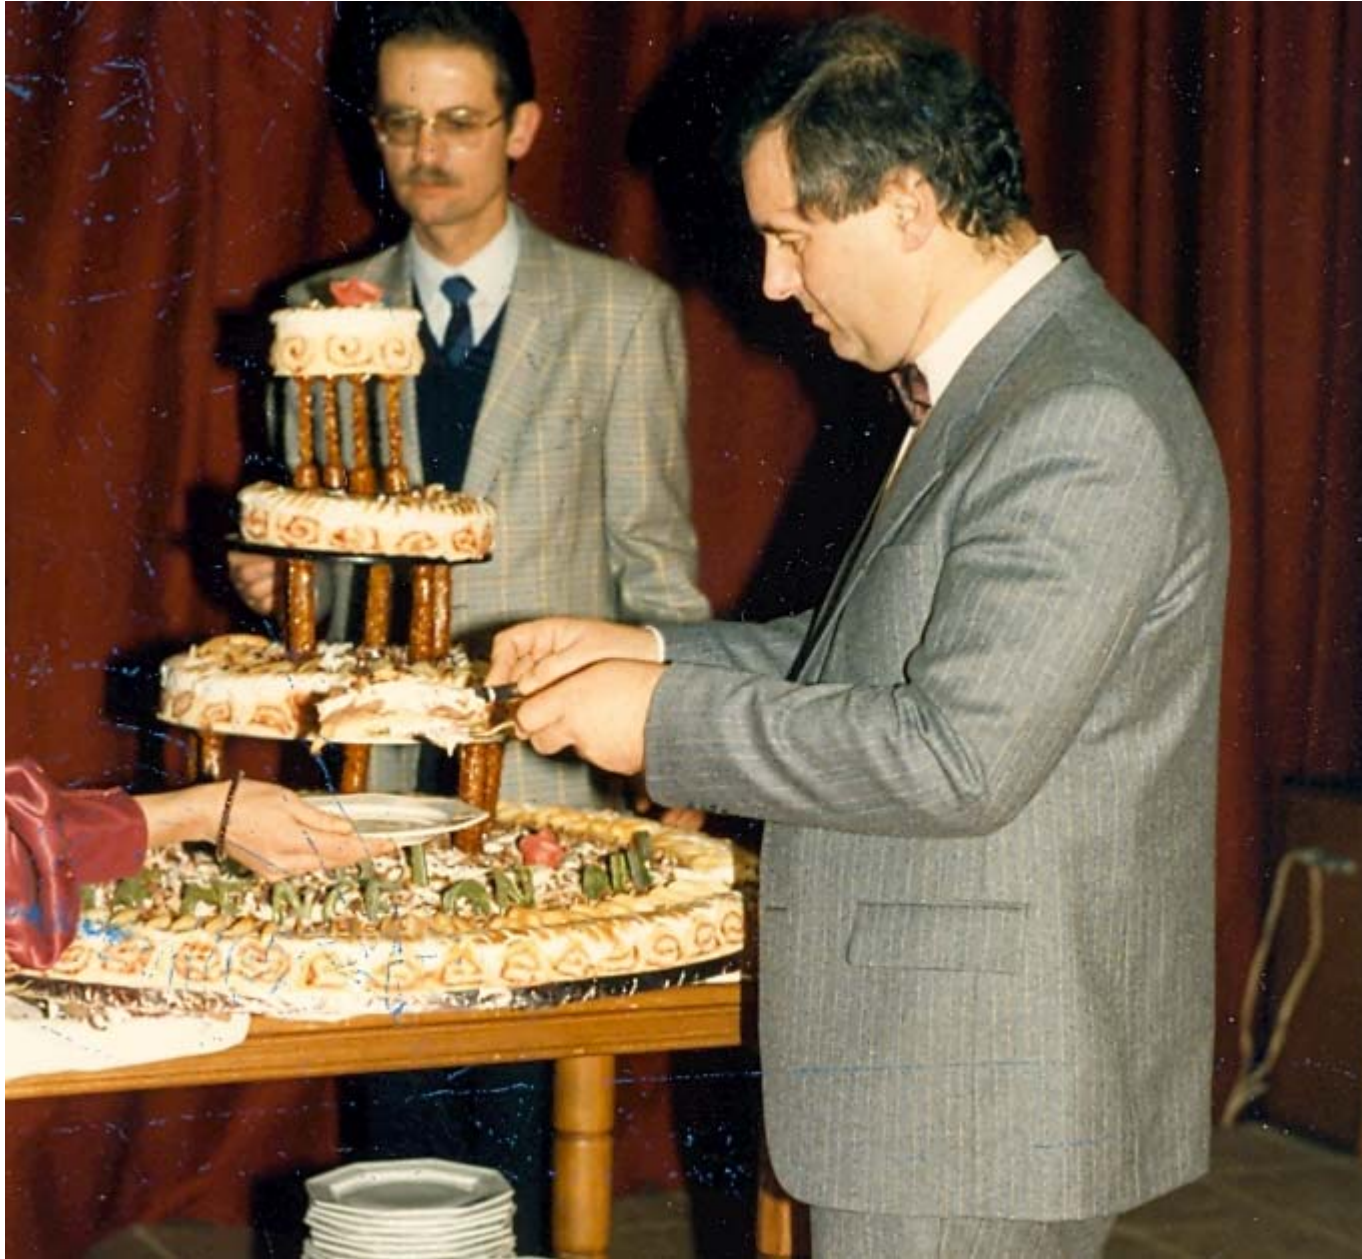

The amazing dessert at the Lyon Winter Plasma Conference, 1987.

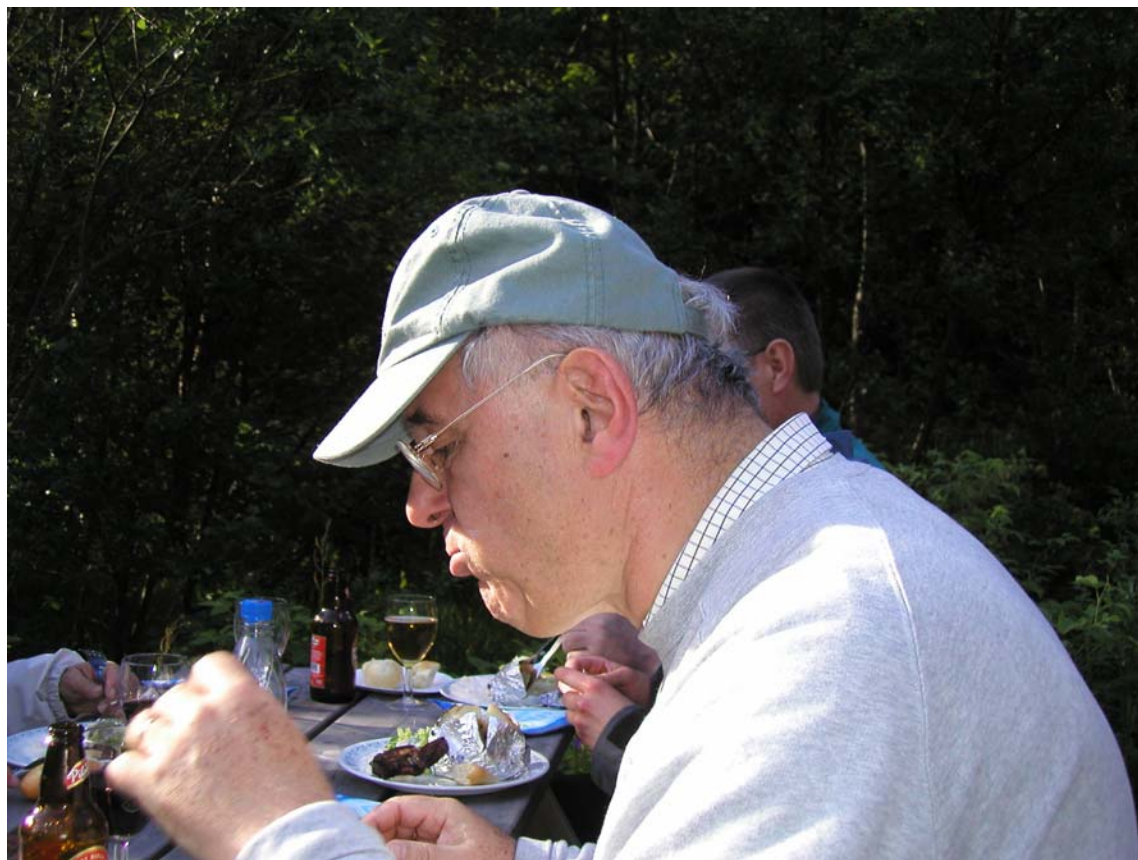

2004 Nordic Conference on Plasma Spectrochemistry in Loen/Norway at the open air grill party

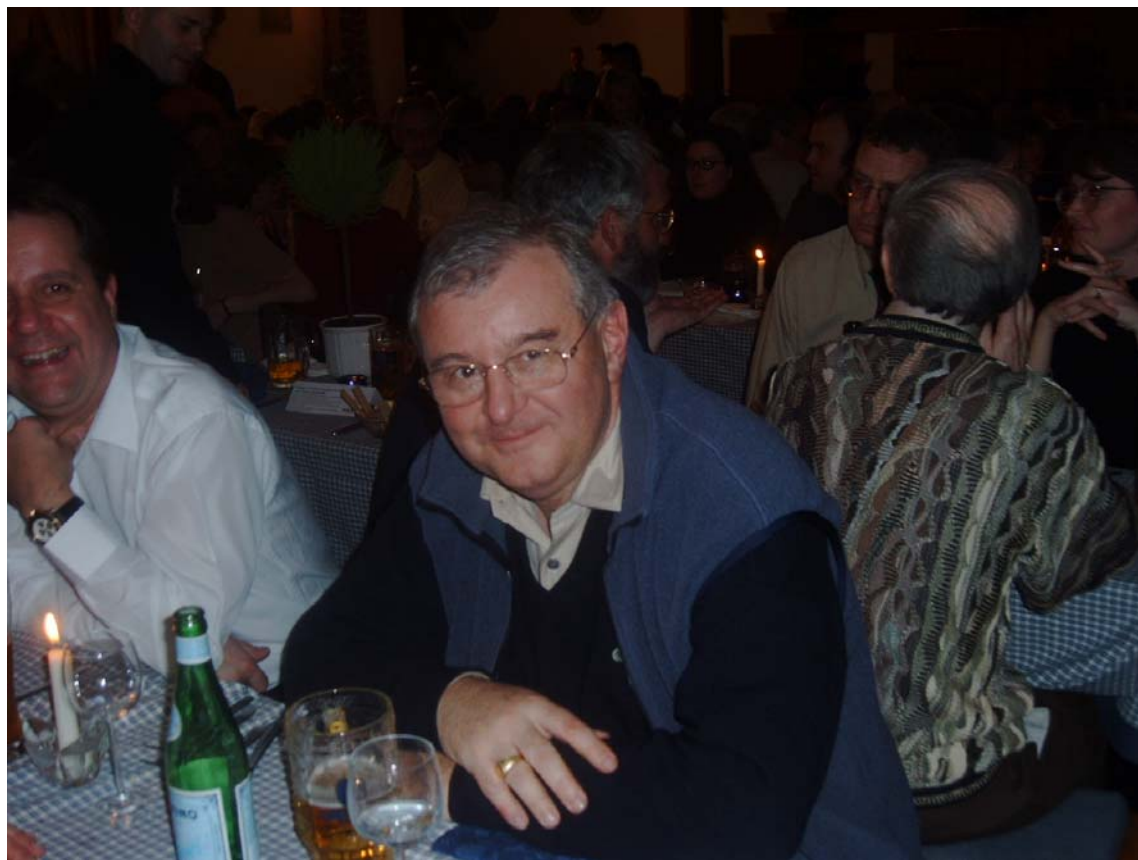

European Winter Conference on Plasma Spectrochemistry 2003  
in Garmisch (Bavarian Evening)

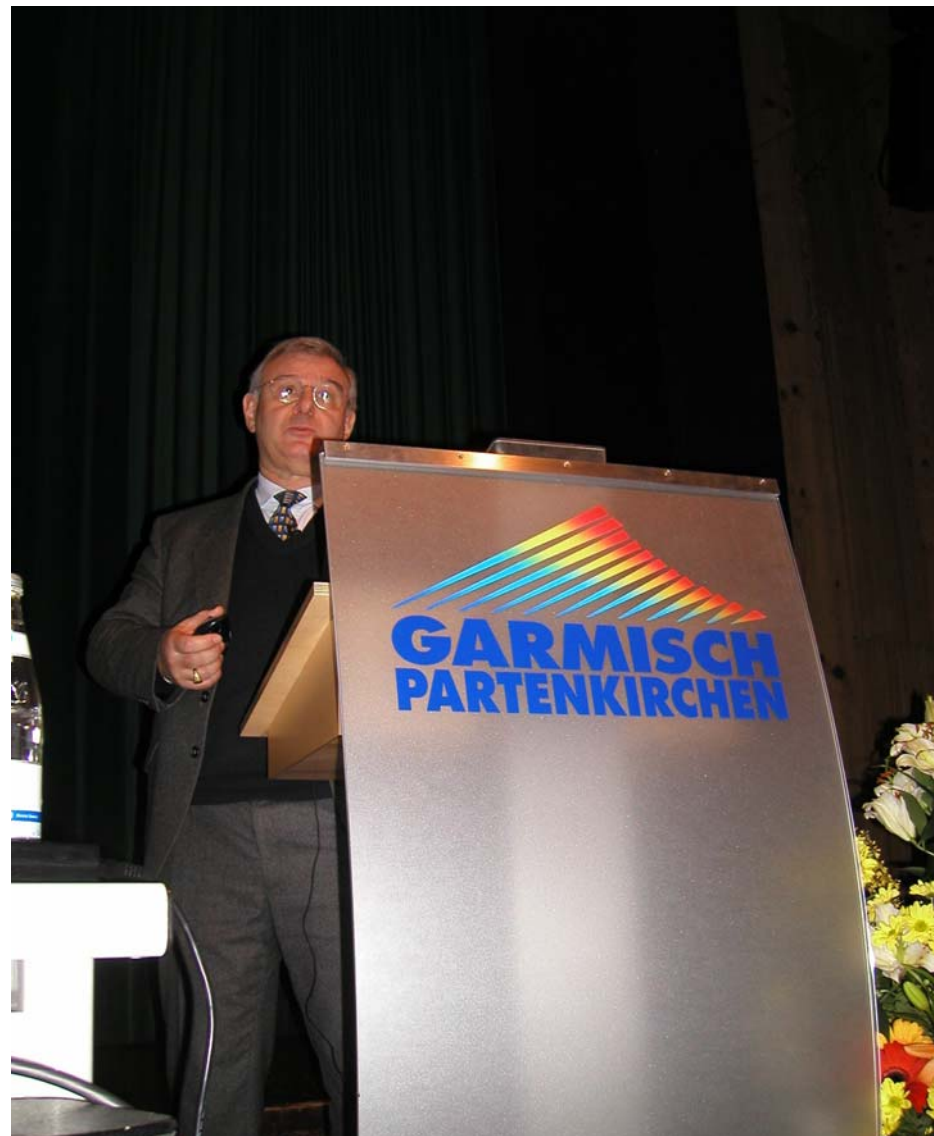

European Winter Conference on Plasma Spectrochemistry 2003 in Garmisch  
(conference talk of Jean Michel)
